# Supplementary material for: Fabrication Methods of the Polygonal Masonry of Large Tightly Fitted Stone Blocks with Curved Surface Interfaces in Megalithic Structures of Peru
Source: Preprints.org preprint supplement (doi:10.20944/preprints202108.0087.v2), 2021-10-14
Supplement: Supplementary file 1 [file supplementary]

# Способы изготовления полигональной кладки из крупных плотно подогнанных каменных блоков с криволинейными поверхностями сопряжения в мегалитических комплексах Перу

Р. В. Лапшин, к. т. н.

НИИ Физических проблем им. Ф. В. Лукина, г. Зеленоград

Эл. почта: [rlapshin@gmail.com](mailto:rlapshin@gmail.com)

В статье предложены способы создания наиболее сложной в исполнении разновидности обнаруженной в Перу полигональной кладки. Эта кладка состоит из крупных каменных блоков весом от нескольких сотен килограмм до нескольких тонн, сопрягаемых друг с другом вплотную практически без зазора через сложные криволинейные поверхности большой площади. В работе даётся описание приёмов, которые, по-видимому, использовали строители, прибывшие из Европы. Обсуждаемые приёмы базируются на применении уменьшенной глиняной модели, 3D-пантографа и реплик. Использование уменьшенной глиняной модели и пантографа обеспечивает не только оригинальный вид и высокое качество кладки из больших блоков, но и позволяет заметно повысить производительность труда строителей. Поскольку механизмы копирования трёхмерных объектов известны с 18 века, то и рассматриваемые каменные постройки следует датировать не ранее этого времени. Остальные более простые виды полигональной кладки, когда камни небольшие или сопрягаемые поверхности близки к плоскостям, или камни контактируют друг с другом по малой площади, или между камнями имеются значительные зазоры, вполне соответствуют известным способам обработки камня того и более раннего времени, и поэтому не требуют каких-то специальных объяснений.

Материал впервые опубликован 11 апреля 2021 г. в [блоге автора](#).

Ключевые слова: каменный блок, полигональная кладка, глиняная модель, пантограф, реплика, зубило, молоток, мегалит, Инки, Куско, Ольянтайтамбо, Мачу-Пикчу, Перу

Copyright © 2021 Р. В. Лапшин, лицензия Creative Commons Attribution

## 1. Введение

Полигональная кладка это разновидность кладки из природного камня. Камни, изначально имеющие произвольную форму, обрабатываются так, что образуют на лицевой стороне постройки плотно прилегающие друг к другу неправильные многоугольники (полигоны). Отметим сразу, что название “полигональная кладка” в большой степени условное. Дело в том, что существует множество построек, относимых к полигональным, в которых каменные “многоугольники” помимо прямолинейных содержат и криволинейные участки. К особенностям полигональной кладки относится то, что она не требует связующего раствора (сухая кладка). Полигональная кладка обладает достаточной прочностью и устойчивостью, чтобы выдерживать землетрясения средней силы.

В настоящей работе рассматриваются полигональные кладки в мегалитических постройках, расположенных на территории современного Перу. Основное внимание уделено кладкам, которые состоят из крупных каменных блоков весом от нескольких сотен килограмм до нескольких тонн, сопряжённых друг с другом практически без зазора через криволинейные поверхности большой площади. Остальные более простые виды полигональной кладки, когда камни небольшие или сопрягаемые поверхности близки к плоскостям, или камни контактируют друг с другом по малой площади, или между камнями имеются значительные зазоры, вполне соответствуют известным с древних времён способам обработки камня и поэтому никакого специального объяснения не требуют.

В целом полигональная кладка ни есть что-то небывалое, такая кладка известна в Европе с античных времён. В перуанском варианте поражает только качество выполненных криволинейных стыков, которое даже в наше время повторить непросто. Предлагаемые как со стороны научного сообщества,<sup>1, 2, 3</sup> так и со стороны энтузиастов<sup>4, 5, 6</sup> способы изготовления перуанской полигональной кладки не объясняют всех наблюдаемых её особенностей и часто далеки от реальности.

Если внимательно присмотреться к форме камней в кладке, к местам их практически идеального сопряжения, то возникает ощущение того, что камни не обрабатывались механически, а были вылеплены. В связи с этим многие исследователи ошибочно решили, что камни вылепливались или отливались из некой пластичной массы – искусственного гранита, бетона, извести, размягчённой нагревом горной породы и прочее.<sup>5, 6</sup> В этой связи сразу возникает вопрос: Зачем производить недешёвую пластичную массу, если вокруг полно уже готового к употреблению материала – природного камня произвольной формы? Ну и совсем непонятно: Зачем пластичной массе придавать такие сложные формы? Почему бы, например, не сделать ограниченный по номенклатуре набор из стандартных бетонных блоков, имеющих замковые элементы?

Есть и другие доводы против пластичной версии. Например, тыльная сторона многих блоков представляет собой рваный камень, отсутствуют затекания пластичной массы в межблоковые пространства внутри кладки, на каменных блоках имеются прожилки и другие особенности свойственные натуральному камню; не наблюдаются сложные формы и сильные кривизны профилей сопряжения соседних блоков характерные для пластичной технологии; у последнего ряда якобы бетонных блоков (Саксайуаман) верхний свободный край кладки почему-то рваный и негоризонтальный и др.<sup>7</sup>

Предлагаемые автором способы изготовления полигональной кладки базируются на применении уменьшенной глиняной модели, 3D-пантографа<sup>8</sup> и реплик<sup>1</sup>. Основным инструментом обработки камня выступает молоток и стальное зубило (набор зубил). Использование уменьшенной глиняной модели и пантографа обеспечивает не только оригинальный вид и высокое качество кладки из больших блоков, но и позволяет заметно повысить производительность труда строителей. Только благодаря высокой производительности было возможно реализовать имеющиеся в Перу объёмы полигонального строительства за разумное время, привлекая разумное количество рабочей силы. Поскольку механизмы копирования трёхмерных объектов известны в Европе с 18 века, то и рассматриваемые полигональные постройки следует датировать, начиная с этого времени.

Так как к моменту завоевания Южной Америки европейцами индейцы не знали ни железных орудий, ни колеса, и не имели тягловых животных, то рассматриваемые постройки могли быть возведены только строителями, прибывшими из Европы. В отличие от индейцев строители эти обладали всеми необходимыми инструментами, механизмами и навыками масштабного строительства. Следы этого масштабного строительства из камня видны повсюду – католические соборы, монастыри, дворцы, виллы, масса городских и промышленных построек. Всякое масштабное строительство всегда подразумевает наличие соответствующей этому масштабу экономики. Поэтому в статье дополнительно объяснено, на чём базировалась экономика Перу тех лет.

## 2. Способы изготовления полигональной кладки

### ***2.1. Перенос формы глиняной модели на каменную заготовку с помощью пантографа***

На первом этапе в соответствии с эскизом в уменьшенном масштабе изготавливалась глиняная модель постройки, блоки которой образуют полигональную кладку. Пусть для определённости постройкой является просто стена. Из глины вылепливались небольшие полигональные блоки задуманной формы. Размеры этих блоков соответствовали размерам, скажем, баскетбольного мяча или около того. Места сопряжения поверхностей формировались вдавливанием блоков друг в друга.

Из сырых модельных блоков собиралась модель стены. В ходе сборки между блоками прокладывался материал, препятствующий слипанию блоков в процессе сушки-затвердевания. Чтобы уменьшить влияние усадки, вначале сушился нижний ряд, затем следующий за ним и т. д. При необходимости стене придавался требуемый наклон. В

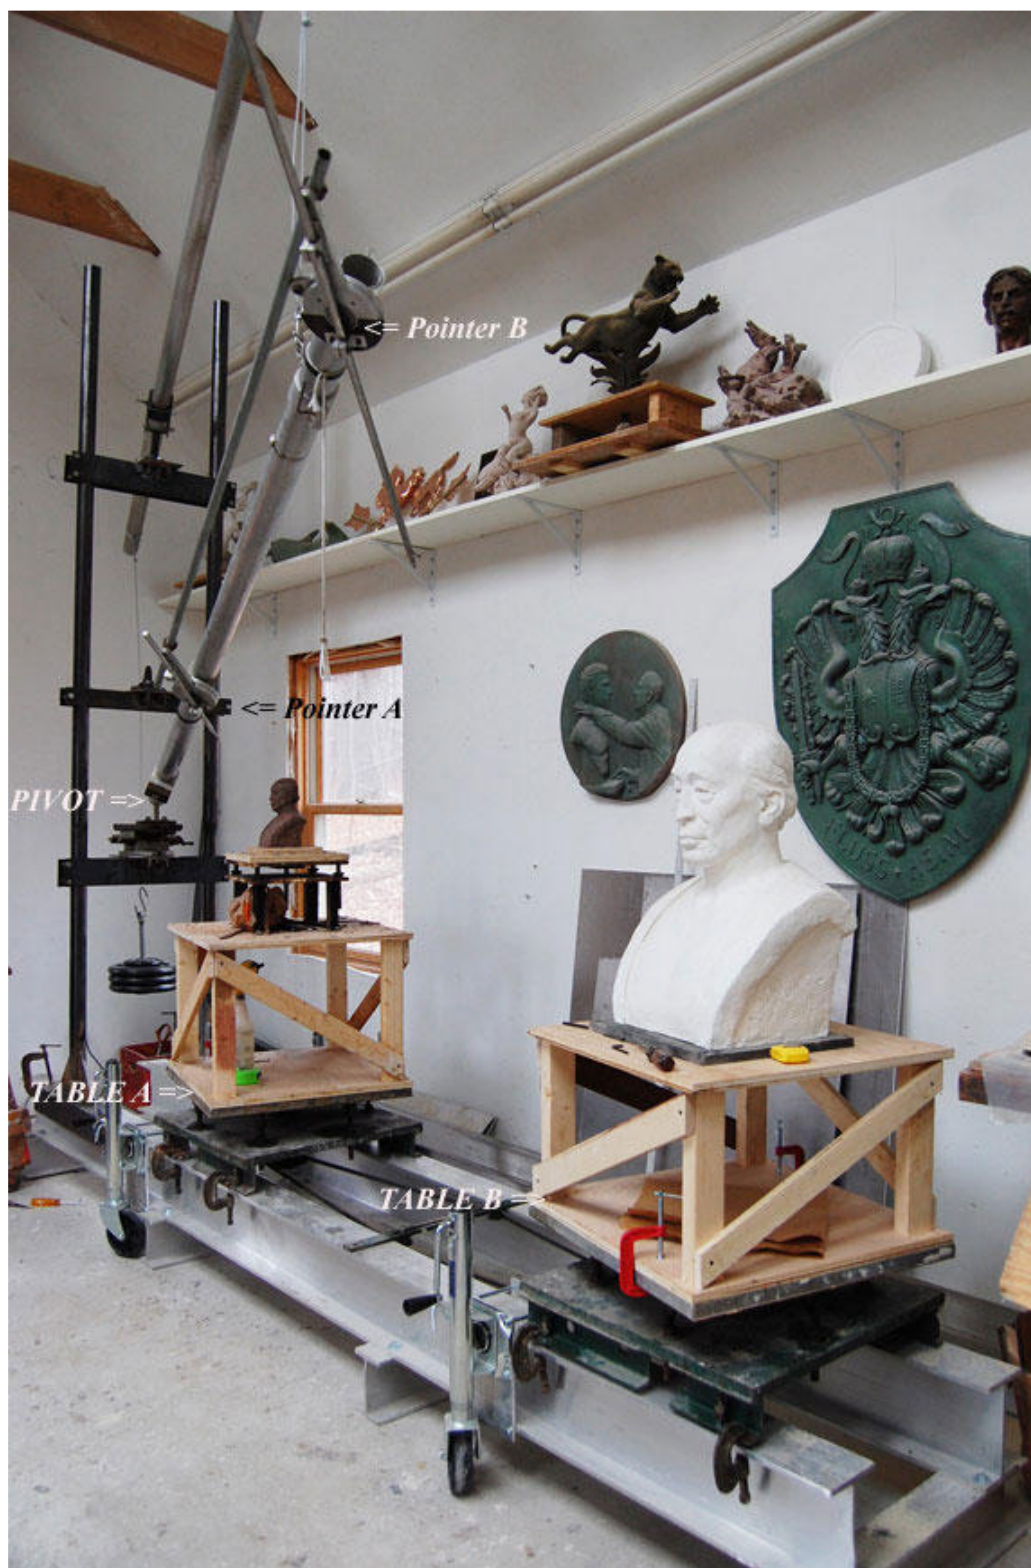

Рис. 1. Современный 3D-пантограф (автор фотографии М. Keropian)

процессе сушки-усадки модельные блоки досопрягались более точно под собственным весом и с небольшими правками строителя.

После затвердевания модели стены, стена разбиралась. Теперь начиналась “магия”. Средневековые европейские строители с помощью 3D-пантографа,<sup>8</sup> молотка и стального зубила переносили с заданным масштабом рельеф поверхности с небольшого модельного глиняного блока на большую каменную заготовку, подходящих размеров и формы.

Пантограф представляет собой простое рычажное устройство, в основе которого лежит параллелограммный механизм. 2D-пантограф, позволяет пропорционально увеличи-



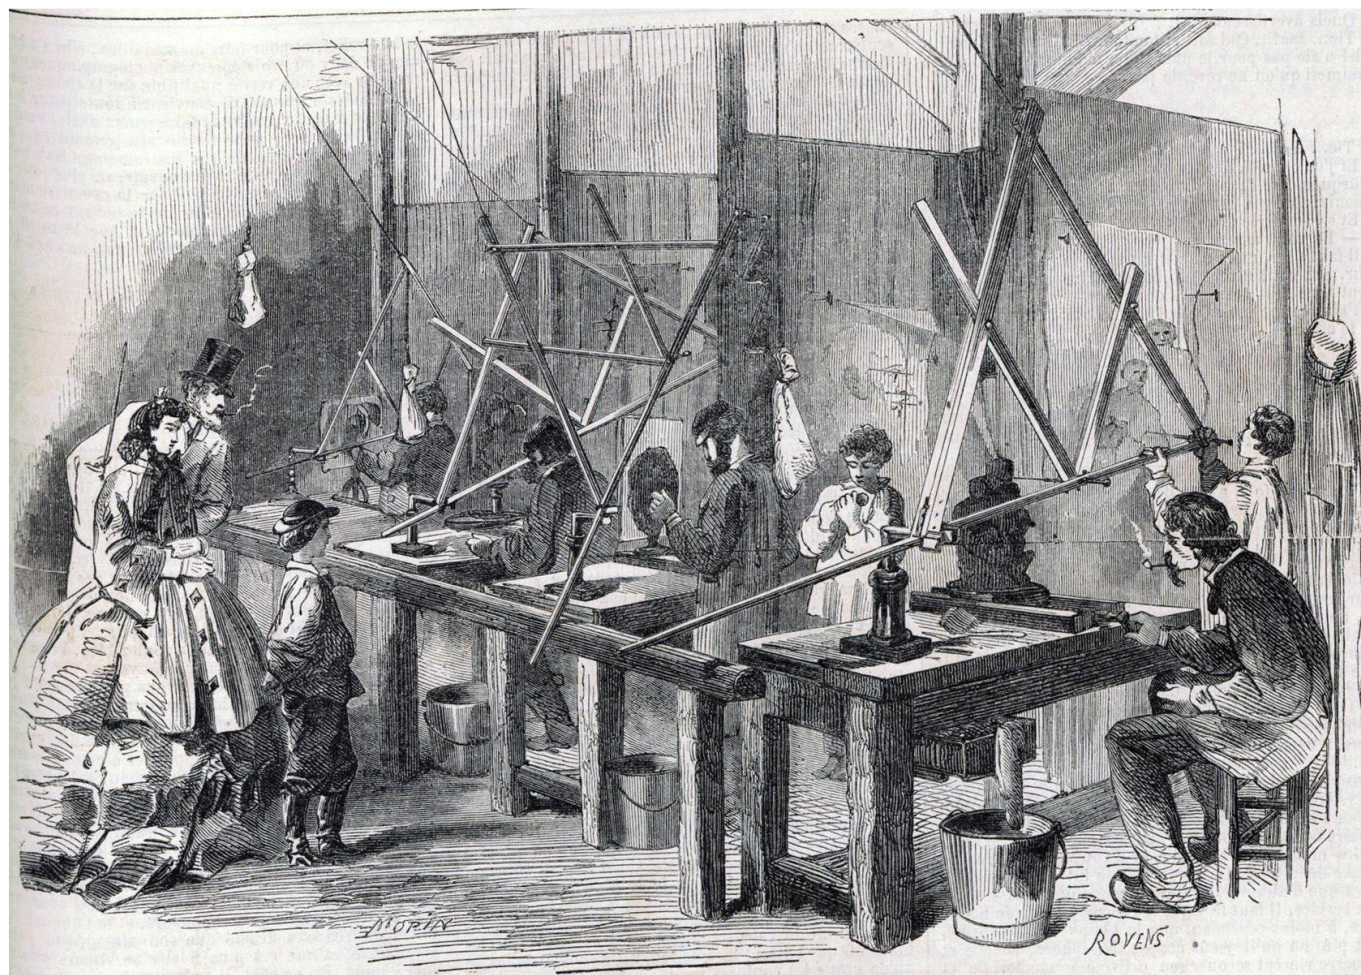

Ателье 19 века по копированию статуй с помощью 3D-пантографа (рисунок тушью, художники Е. Morin и Е. Rovens, 1864)<sup>11</sup>

вать/уменьшать плоский рисунок.<sup>9</sup> Несколько более сложный 3D-пантограф<sup>10</sup> (см. Рис. 1), являющийся логическим развитием 2D-пантографа, позволяет пропорционально увеличивать/уменьшать объёмную фигуру, например, статую. В нашем случае с помощью 3D-пантографа получали увеличенную копию небольшой глиняной модели блока, обрабатывая молотком и зубилом каменную заготовку.

Параллелограммный механизм расположен на стреле 3D-пантографа. Стрела крепится к раме с помощью шаровой опоры (см. Pivot на Рис. 1). Стрела снабжена противовесом. На одном плече параллелограммного механизма закреплён острый щуп (Pointer A), на другом – указатель (фактически такой же щуп; Pointer B на Рис. 1). Если коснуться щупом глиняной модели, то указатель покажет, где в пространстве находится соответствующая точка увеличенной копии. Коэффициент увеличения задаётся должной установкой плеч рычажной системы. Модель и её увеличенная копия располагаются каждая на своей поворотной платформе (Table A и Table B, соответственно). Платформы благодаря цепной передаче можно синхронно поворачивать вокруг их вертикальных осей, подставляя под щуп/указатель разные стороны 3D-объекта (модели/копии).

Минимальный размер модельного глиняного блока зависел от размера изготавливаемого каменного блока и, в конечном счёте, определялся погрешностью работы механизма пантографа. Размер модельного блока также определялся тем, насколько удобно управлять с таким блоком (лепить, править, переносить, устанавливать, сдвигать, переворачивать и т. п.) одному-двум работникам. Современные 3D-пантографы, используемые скульпторами<sup>10</sup> (см. Рис. 1), позволяют увеличивать модель объекта до 6 раз. Таким образом, по глиняной модели блока размером, скажем,  $50 \times 50 \times 50 \text{ см}^3$ , которую для облегчения и уменьшения усадки можно сделать пустотелой, с помощью не самого большого пантографа возможно обрабатывать каменные блоки размером до  $3 \times 3 \times 3 \text{ м}^3$ .



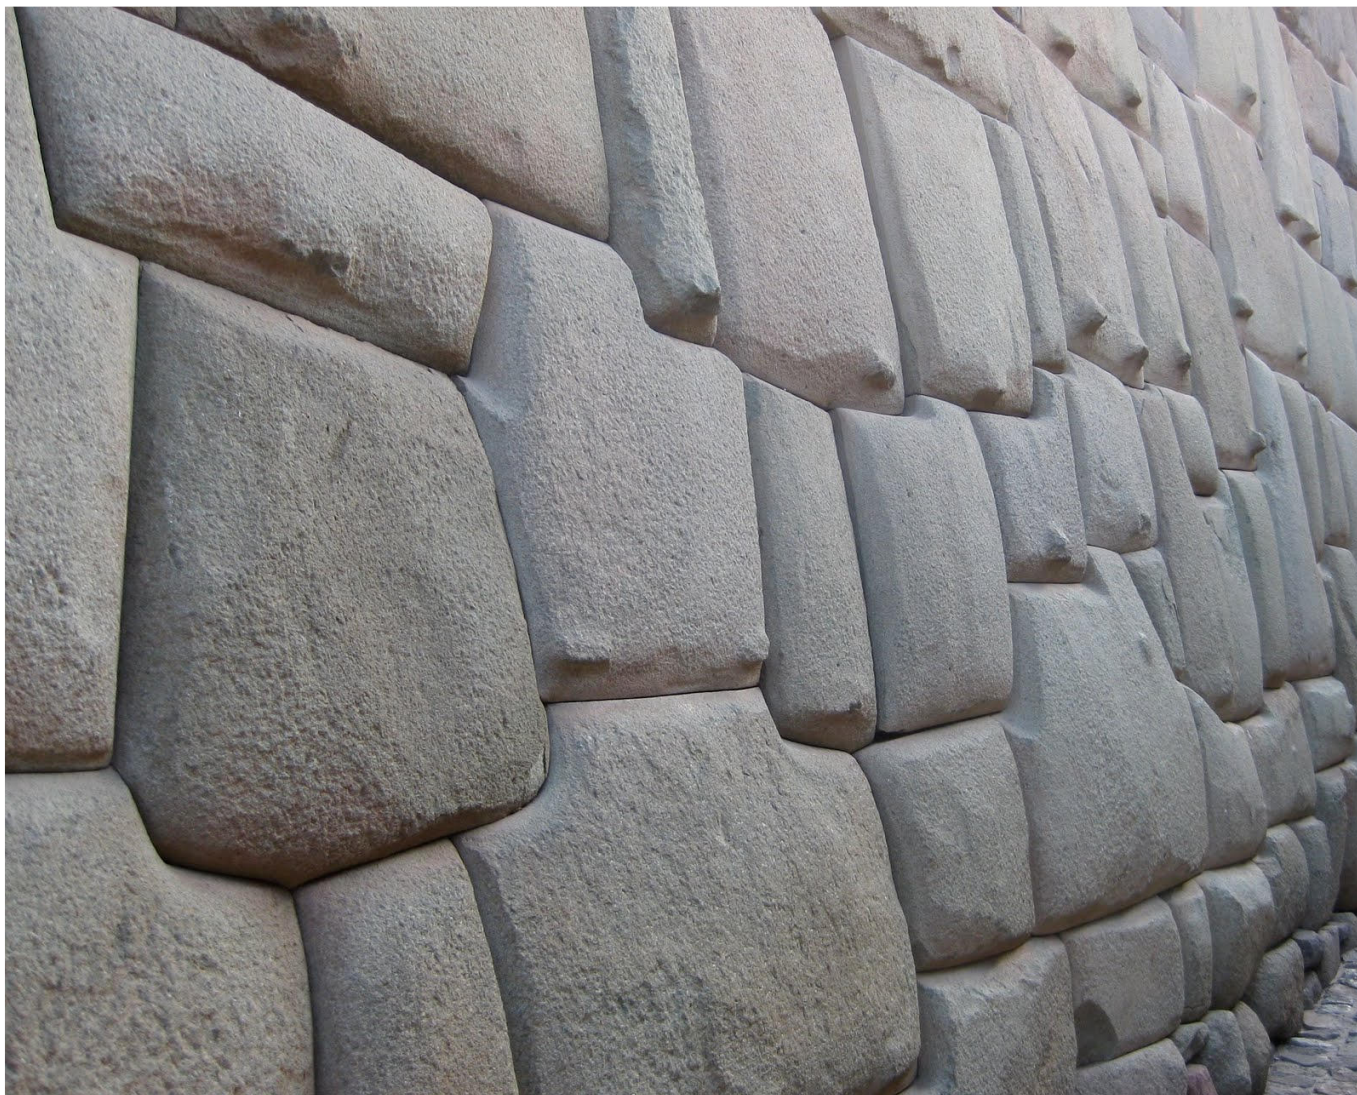

Фото. 1. Куско (А. Kuusivaara, 2017)

Отметим, что, установив на пантограф каменную заготовку, можно быстро подобрать подходящую для этой заготовки глиняную модель блока. Данная возможность крайне полезна именно в случае полигонального типа кладок, так как в таких кладках блоки часто имеют сложную форму, что при подборе заготовки требует множества предварительных обмеров.

После указанного копирования с заданным масштабом стена из каменных блоков без каких-либо подгонок собиралась с использованием катков, рычагов, блоков, лебёдок и примитивных кранов того времени. Лицевая сторона каменного блока может копироваться с лицевой стороны глиняной модели, но может обрабатываться или дорабатываться после сборки полигональной постройки.

При размещении полигональной кладки на выровненном укреплённом грунте первый ряд образуют каменные блоки небольшого размера с плоским основанием, которые обрабатываются по соответствующим глиняным моделям. Каменные блоки второго ряда обычно крупнее блоков первого ряда (см. для примера Фото. 1-4). Почему так? Почему большие камни второго ряда не кладутся на такие же большие или ещё большие камни? Всё просто. Только подсыпая грунт под небольшие блоки первого ряда и подкладывая под них мелкие камушки, играющие роль клиньев, возможно выбрать боковые зазоры между большими каменными блоками второго ряда, т. е. правильно расположить эти блоки относительно друг друга. Только при условии правильного относительного расположения блоков второго ряда все остальные ряды можно уложить с минимальными зазорами.



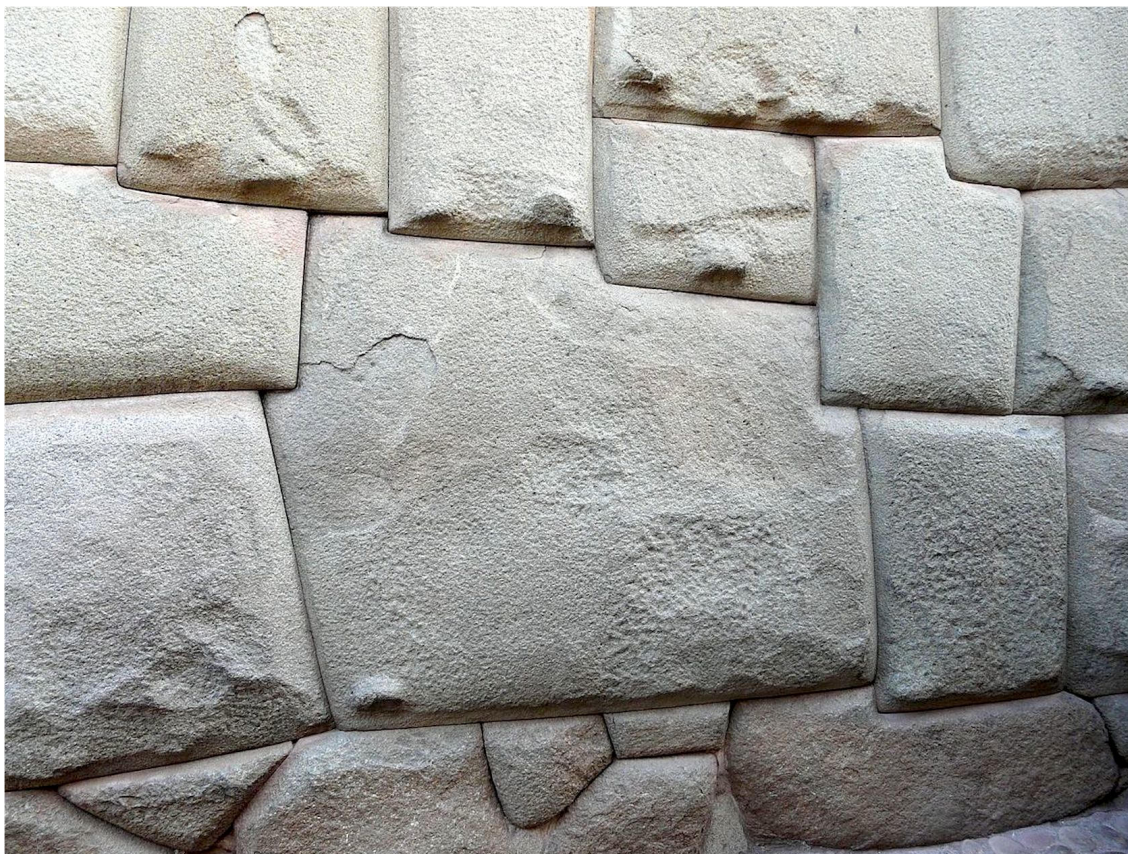

Фото. 2. Куско (Gvillemin, 2008)

Указанная особенность является ещё одним подтверждением того, что стенка из полигональных блоков рассматриваемого типа не строилась ряд за рядом с подгонкой камней по месту,<sup>3</sup> а изготавливалась по уменьшенной глиняной модели и затем только собиралась. При строительстве ряд за рядом первый ряд кладки всегда бы состоял из самых крупных каменных блоков, поскольку при таком подходе как посадочное место под очередной каменный блок, так и сам этот каменный блок изготавливаются последовательно по месту.

Если основание из небольших каменных блоков первого ряда выбивается из общей эстетики конкретной полигональной кладки, то оно скрывается слоем грунта (см. Фото. 10). Подсыпaeмый грунт под весом кладки будет уплотняться, а подкладываемые мелкие камушки-клинья могут трескаться и крошиться, тогда кладка будет “разъезжаться”. Чтобы исключить такое развитие, используются твёрдые без видимых дефектов клинящие камушки и не в одном, а в нескольких местах, грунт под постройкой хорошо уплотняется, после укладки двух первых рядов работы на данном участке останавливают и за кладкой некоторое время наблюдают и т. п.

В случае размещения полигональной кладки на скальном основании, оно предварительно подготавливается. Например, в скальном основании изготавливаются L-образные выемки. Далее из глины на подготовленном участке скалы формируются небольшие блоки первого ряда, которые для облегчения их веса и уменьшения усадки делаются полыми. После сушки блоки извлекаются из скального основания и помещаются в пантограф на место каменной заготовки (Table B на Рис. 1). С помощью пантографа по глиняным блокам первого ряда изготавливаются их уменьшенные глиняные модели. Полученные модели сушатся.

Чтобы исключить повреждение нижней поверхности модельных блоков первого ряда, модельные блоки помещают в ложа с плоским основанием, вдавливая в бруски из сырой глины. Правильное взаимное положение модельных блоков первого ряда определяется по примыканию этих блоков друг к другу по боковым граням. Для уменьшения погрешно-



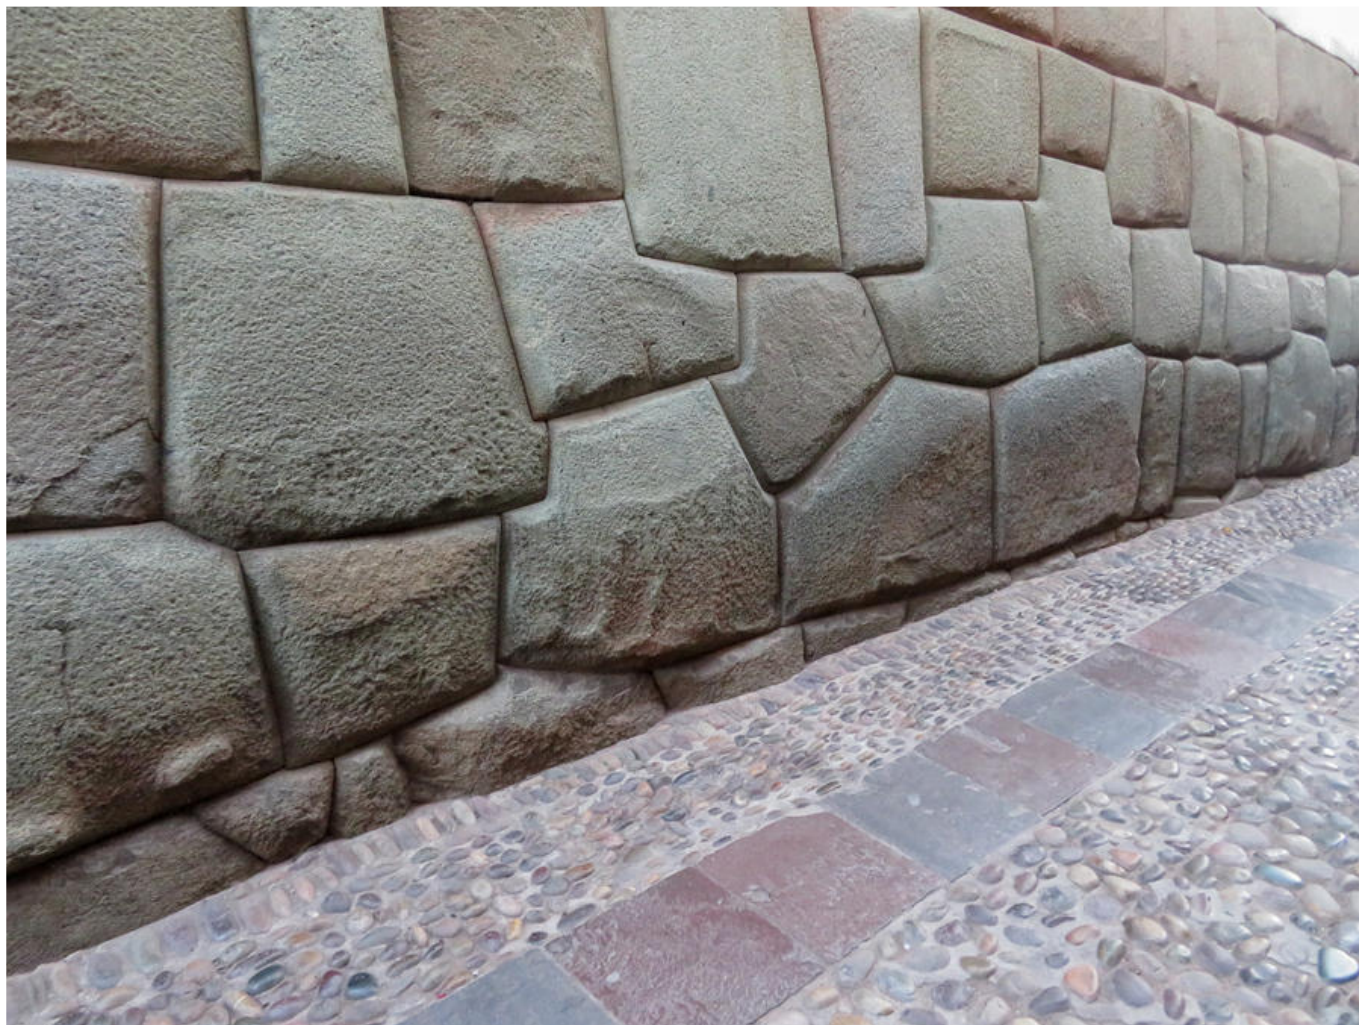

Фото. 3. Куско (С. Н. Козинцев)

сти взаимного положения площади боковых граней блоков первого ряда следует стремиться делать сравнимыми с площадями оснований этих блоков. Правильное взаимное положение блоков первого ряда на месте постройки модельной стены достигается подсыпанием грунта и подкладыванием мелких клинящих камушков под ложа этих блоков.

Предложенный способ переноса геометрии с небольшой глиняной модели на большой каменный блок с помощью 3D-пантографа не требует детальной прорисовки геометрии блока. Строителю требуется фактически руками (применяя стеки, шпатели, правила, скребки и т. п. инструменты) приблизительно вылепить желаемое сопряжение модельных блоков в соответствии с общей задумкой на эскизе, затем заложить этот блок в модельную стенку, где блок окончательно под собственным весом и с небольшими правками строителя досопрягается с соседними модельными блоками. Никакие точные размеры при этом выдерживать не нужно.

## **2.2. Использование реплик**

Не очень сложные сопряжения крупных блоков выполнялись с использованием реплик. Из глины выдавливался/раскатывался “блин” постоянной толщины. Сырой блин укладывали на каменный блок, реплику поверхности которого нужно было изготовить. После затвердевания реплику-блин снимали. Периодически прикладывая полученную лёгкую реплику-блин к тяжёлому ответному каменному блоку, постепенно удаляли в нужных местах лишний материал до полного прилегания реплики к блоку.

Если требовалась бóльшая точность передачи рельефа, чем та, что обеспечивается репликой-блином, то изготавливалась реплика реплики. Вначале, приложив брусок сырой глины к выбранному участку каменного блока, делали отпечаток его поверхности. После



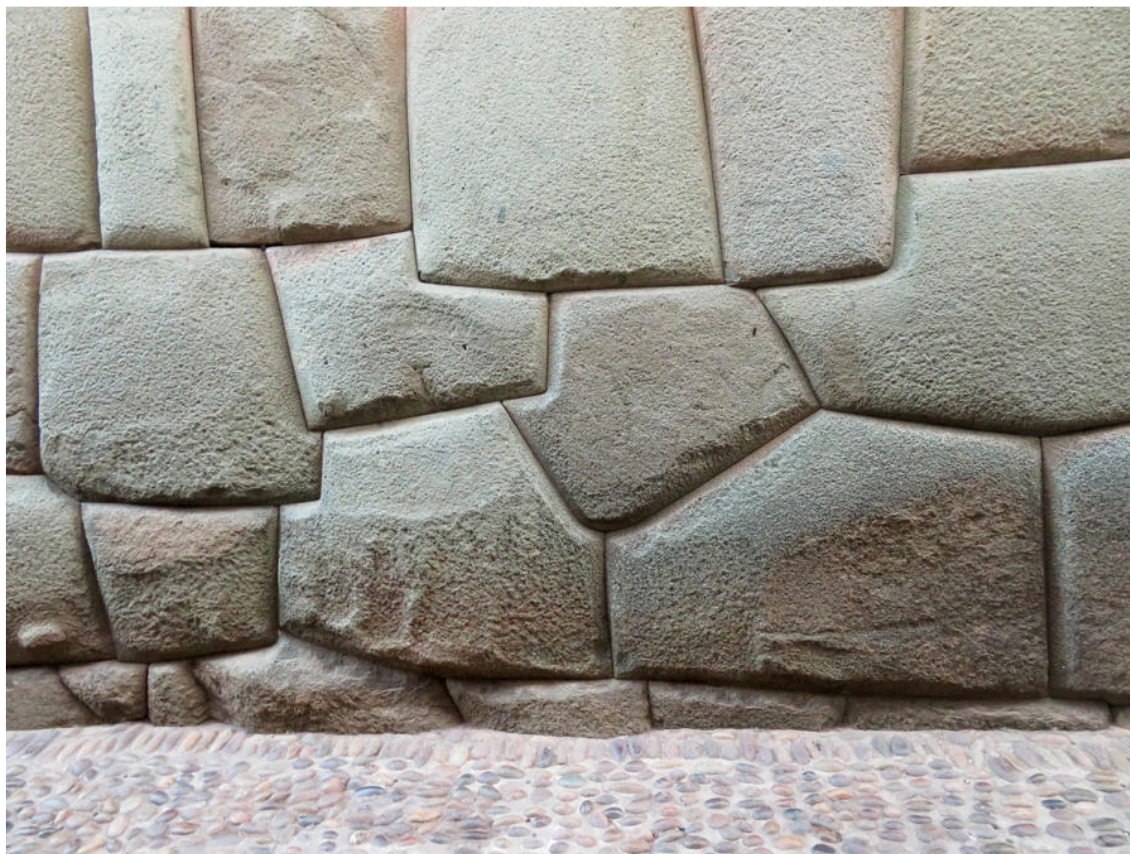

Фото. 4. Куско (С. Н. Козинцев)

затвердевания полученной репликой делали ещё один отпечаток в сырой глине. После сушки реплику реплики использовали далее в качестве копии участка поверхности каменного блока при изготовлении ответной части каменной кладки.

В другом способе по периметру выбранного участка каменного блока устанавливали бортик из глины, после чего образовавшуюся емкость заполняли гипсом. После затвердевания полученной репликой делали отпечаток в сырой глине или, установив бортик, заполняли образовавшуюся емкость гипсом (поверхность гипсовой формы предварительно покрывалась составом, препятствующим схватыванию заливаемого гипса с гипсовой формой). После сушки полученную реплику реплики использовали далее в качестве копии участка поверхности каменного блока при изготовлении ответной части каменной кладки.

Реплики также использовались в местах примыкания каменных построек из крупных блоков к скалам. Реплика снималась с предварительно подготовленного участка скалы и затем прикладывалась к обрабатываемому каменному блоку, или наоборот реплика снималась с обработанного каменного блока и затем прикладывалась к обрабатываемой скале. Всё зависело от того, что было удобнее в каждом конкретном случае. Поскольку очень большие каменные блоки подобны скалам – их чрезвычайно трудно двигать, то реплики также использовались при стыковке больших блоков к очень большим блокам и очень больших блоков к другим очень большим блокам.

Чем больше размеры каменного блока, тем больше и тяжелее изготавливаемые по нему реплики. Поэтому, начиная с определённого размера каменного блока, реплики приходится снимать с участков каменного блока. Чтобы обеспечить правильное взаимное положение реплик на обрабатываемой ответной поверхности блока/скалы, участки соседних реплик должны частично перекрываться. Недостатком реплик является более высокая, чем у пантографа, погрешность сопряжения поверхностей смежных блоков и более высокая по сравнению с уменьшенной моделью блока трудоёмкость изготовления.

Преимущество реплики состоит в том, что по образцу (реплике) обрабатывается только одна из сопрягаемых поверхностей смежных блоков, исходная поверхность обрабатыва-



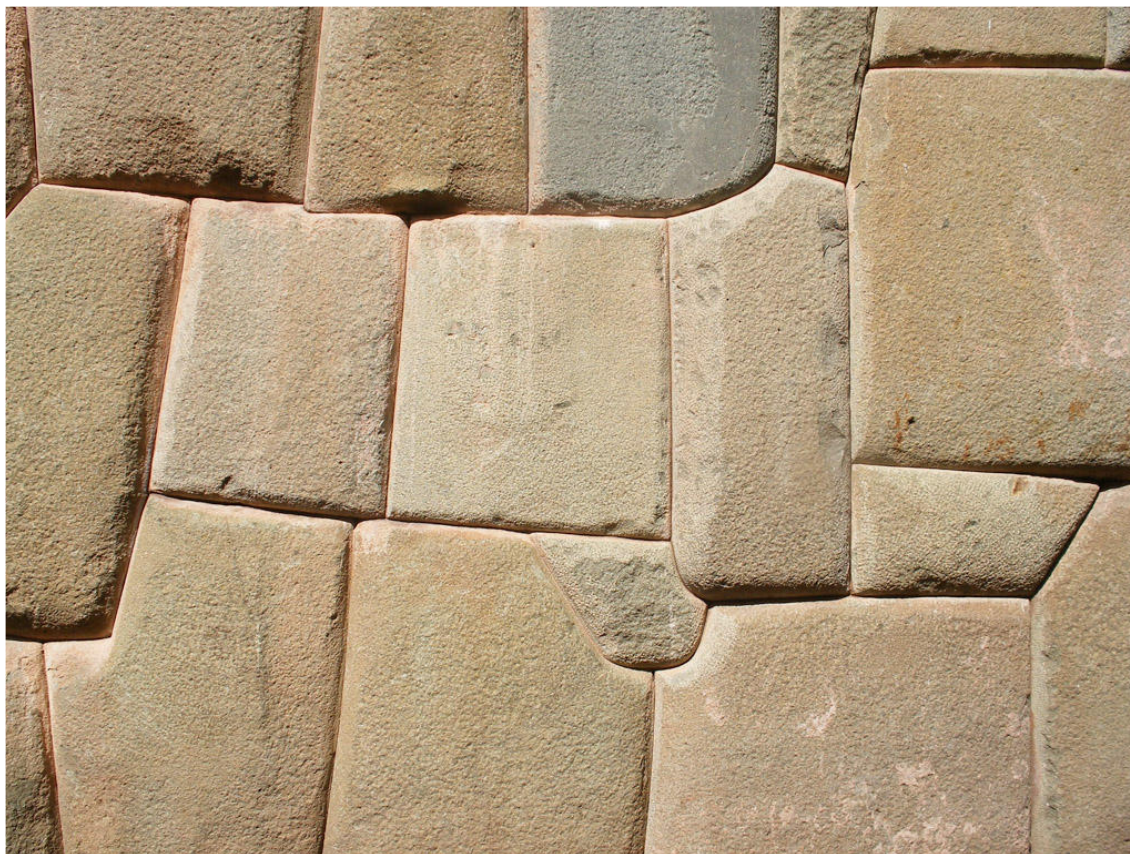

Фото. 5. Куско (R. Mortari, 2013)

ется произвольно (независимо). В отличие от реплики в методе с пантографом необходимо по образцу (модели) обрабатывать обе сопрягаемые поверхности, произвольно обрабатываемых поверхностей нет.

### **2.3. Основная проблема**

Что вынужден постоянно делать каменщик при изготовлении блоков, стыкующихся друг с другом по сложному профилю? Каменщик вынужден постоянно прикладывать один камень к другому, чтобы определять места, где следует удалить лишний материал. Когда камни небольшие, сделать это не сложно. Но, как это сделать, когда вес камней составляет сотни килограмм и тонны? Предложенные способы как раз и позволяют решить данную проблему – многократно перемещать тяжёлый ответный блок более не требуется.

### **2.4. Зачем ещё была нужна глиняная модель объекта?**

Всегда крайне полезно: иметь небольшую модель объекта, состоящего из множества деталей сложной формы, соединяемых друг с другом сложным образом; покрутить каждый блок в руках; точнее оценить пропорции; править блоки, если что-то не понравилось в их форме или сопряжении; собирать/разбирать модельную стену, чтобы проверить принципиальную возможность сборки объекта, содержащего замковые элементы; собирать/разбирать модельную стену, чтобы проанализировать операции по перемещению, монтажу и установке тяжёлых каменных блоков; видеть заранее, как будет выглядеть объект после окончания строительства. Ведь в те времена у архитекторов и строителей не было компьютеров, чтобы поворачивать деталь в пространстве на экране монитора или, создав виртуальную реальность, побродить по задуманному объекту задолго до его постройки. Даже в наше время изготовление макетов в архитектуре и планировании не потеряло своей актуальности.

Как известно, регион, где использовалась полигональная кладка, является сейсмоопасным.<sup>12</sup> Поэтому, создав модель постройки с замковыми блоками и встряхнув её, можно было увидеть, как поведёт себя объект при землетрясении, после чего при необходимо-



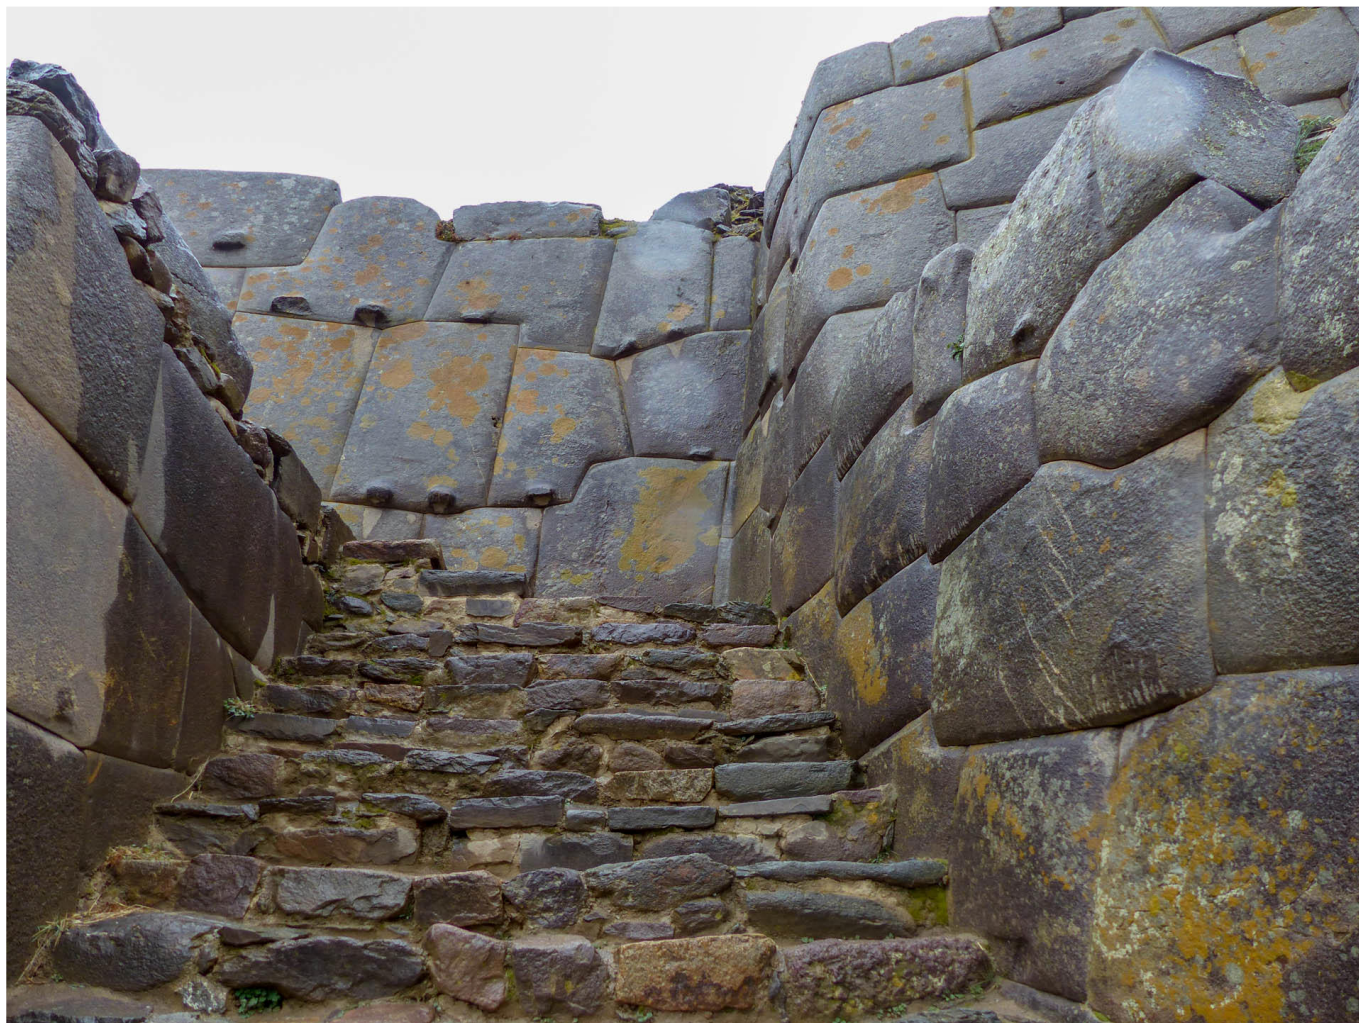

Фото. 6. Ольянтайтамбо (С. Jansen, M. Dürkop, 2016)

сти внести в проект соответствующие исправления. Других способов тогда просто не существовало, расчёты были грубыми, а интуиция и опыт могли подвести.

На верхних гранях ряда каменных блоков обращают на себя внимание характерные выемки под основания блоков, устанавливаемых сверху.<sup>2, 3</sup> Некоторые из этих выемок охватывают два и даже три соседних блока, обеспечивая тем самым перевязку блоков. Данные выемки в соответствии с принципами устойчивого равновесия гарантируют возвращение блоков в исходное положение в случае их небольшого горизонтального смещения во время землетрясения. Рассматриваемые выемки в верхних гранях блоков и соответствующие им выступающие части в нижних гранях устанавливаемых сверху блоков закладываются на этапе лепки глиняной модели.

Так как глиняная модель стены строится снизу вверх и сушится ряд за рядом, то, по идее, неглубокие вдавленности должны возникать естественным образом в основании модельных блоков, которые будучи более мягкими (сырыми) давят своим весом на более твёрдые (сухие) блоки, расположенные под ними. Имеющиеся к настоящему моменту материалы не позволяют с уверенностью подтвердить или опровергнуть наличие такого рода вдавленностей.

## ***2.5. Каковы преимущества пантографа в сравнении с репликой?***

Когда мы прикладываем реплику к обрабатываемой протяжённой поверхности со сложным рельефом, мы не видим чётко, в каких местах и сколько материала следует удалить. Поэтому при работе с репликой приходится чем-то эту реплику окрашивать, скажем, мелом или угольком, и, приложив к обрабатываемому участку поверхности, слегка елозить, чтобы отметить места выборки материала. Вспомните, что делает стоматолог после



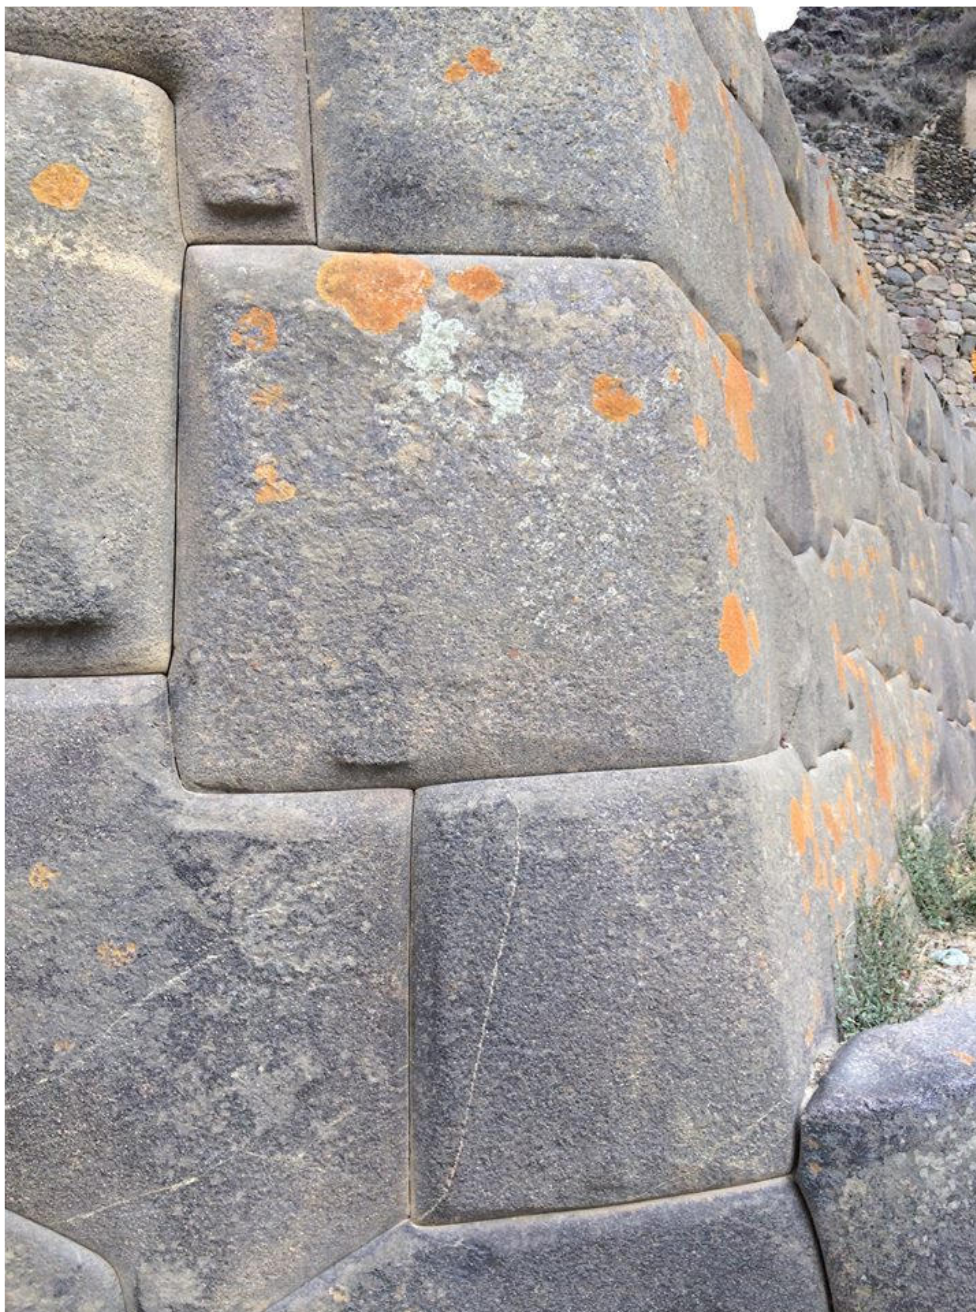

Фото. 7. Ольянтайтамбо (В. Everett)

пломбировки зуба. Он кладёт на пломбу кусочек копировальной (карбоновой) бумаги и просит, закрыв рот, чуть-чуть пожевать её зубами. После чего убирает немного материала пломбы в окрашенном месте. И так повторяет несколько раз, пока зубы при смыкании не займут привычного положения.

При работе с пантографом к глиняной модели прикладывается острый щуп (Pointer A), а к обрабатываемой поверхности заготовки подводится указатель (Pointer B), механически связанный со щупом посредством параллелограммного механизма. В отличие от реплики из-за малой площади щупа и указателя измерение рельефа фактически осуществляется в точке поверхности, причём хорошо видно в какой именно, вся поверхность полностью открыта.

Более того, пантограф позволяет чётко определить толщину удаляемого материала в любой точке, на которую направлен указатель. Следовательно, убирать лишний материал можно за существенно меньшее число попыток. Всё это ведёт к резкому росту производительности. Наибольшая производительность достигается при работе на пантографе двух человек. Один указателем пантографа показывает место (точку) на каменной заго-



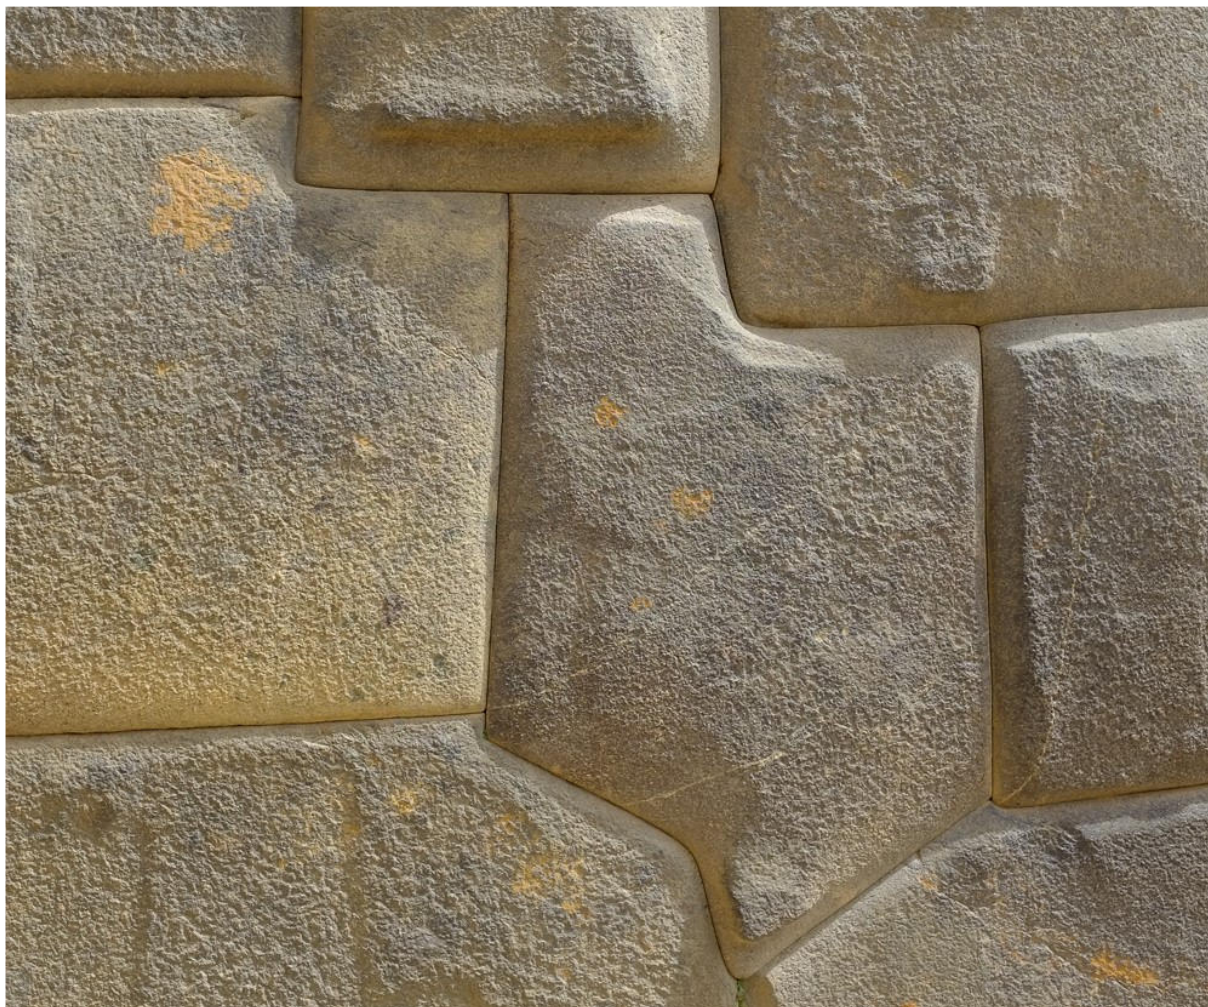

Фото. 8. Ольянтайтамбо (С. Boudou, 2013)

товке и называет толщину удаляемого в этом месте материала, а другой с помощью молотка и зубила убирает указанное количество материала.

Другим преимуществом пантографа в сравнении с репликой является то, что касаться практически невесомым щупом (устройство сбалансировано противовесом) глиняной модели блока значительно быстрее и легче, чем прикладывать сравнительно тяжёлую реплику к каменной заготовке, и затем этой репликой ещё немножко елозить.

Также пантограф позволяет легко выдерживать задаваемые архитектором пропорции, что при применении реплик придётся делать на глазок, долго подбирая заготовки подходящих размеров. Представьте, что вам требуется точно вписать постройку в какой-то неизменяемый или трудно изменяемый габарит, скажем, между двумя скальными выходами или в пещеру. Для этого достаточно измерить расстояние между скальными выходами, размер модели, разделить первое на второе и полученный коэффициент увеличения задать в пантографе.

Что ещё даёт использование глиняных модельных блоков и пантографа? Пусть требуется внешнюю сторону стены изготовить с наклоном. Для этого достаточно положить сырую глиняную модель стены на тыльную сторону, установить упоры, задающие необходимый наклон, сверху на лицевую сторону положить плоскую поверхность, на которой разместить подходящего веса грузы. Вместо грузов можно использовать стягивающие струбцины. Через некоторое время глиняная модель стены деформируется должным образом. Заданный угол в таком способе можно выдерживать очень точно на всём протяжении стены.



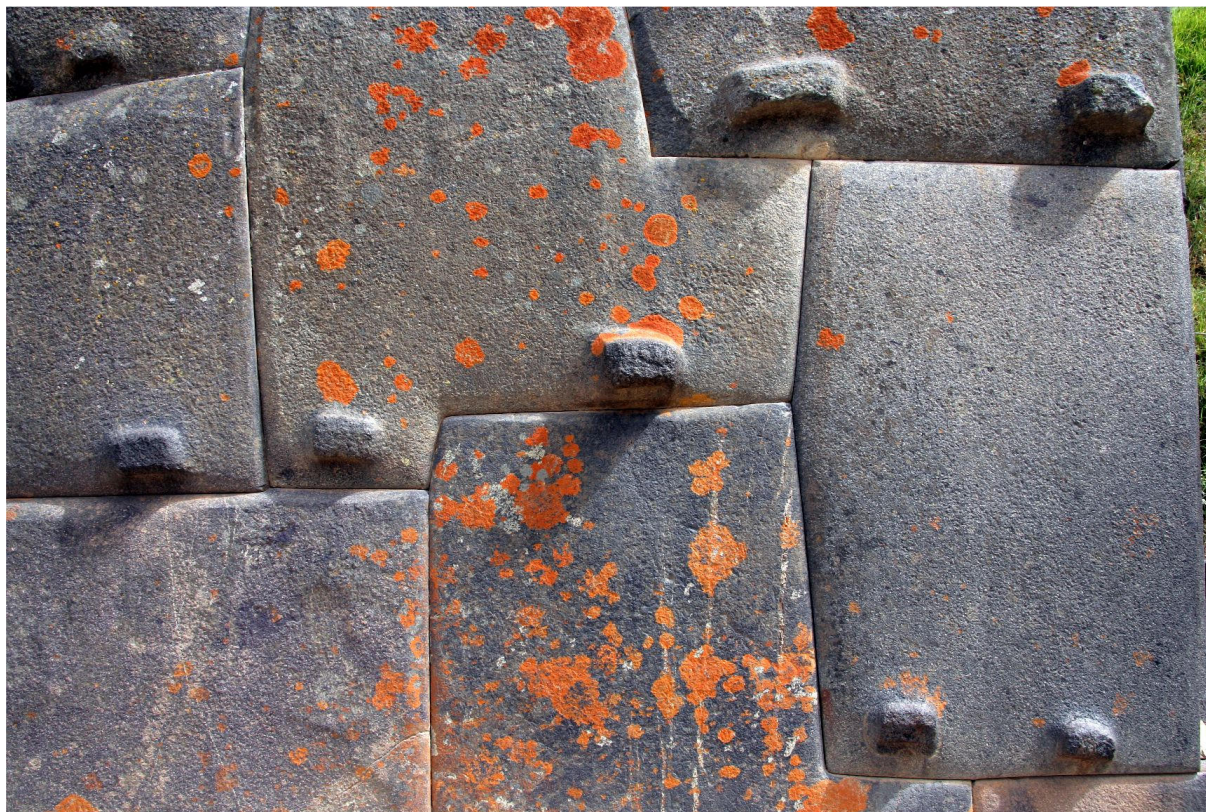

Фото. 9. Ольянтайтамбо (В. Foerster, 2009)

## ***2.6. Обратный подход: создание глиняной модели по каменной заготовке, изготовление поверхности сопряжения и её перенос на каменную заготовку***

Выше описывался способ, при котором вначале по эскизу создавалась модель, а затем под каждый блок модели подбиралась каменная заготовка. Такой способ позволяет повторять помногу раз участок стены (при необходимости в разном масштабе), используя каждый раз одну и ту же глиняную модель. Недостатком способа является большой объём скалываемого материала каменной заготовки. Анализ показывает, что в основном для полигональной кладки использовали обратный способ.

В обратном способе вначале по имеющейся каменной заготовке произвольной формы с помощью пантографа создаётся её уменьшенная глиняная модель. Для этого кусок сырой глины насаживается на заострённый, скажем, трёх/четырёхгранный металлический штырь, расположенный в центре предназначенной для модели поворотной платформы (Table A на Рис. 1). Благодаря такому штырю, модель в любой момент можно снимать с пантографа и точно возвращать на прежнее место. В тех местах модели, где глины не хватает, она добавляется. Удаление излишков глины выполняется непосредственно металлическим указателем пантографа (Pointer A на Рис. 1; вместо острия на указателе можно закрепить подходящий инструмент, например, проволочную петлю, резец, скребок и т. п.), щуп которого (Pointer B) движется по поверхности каменного блока вертикально то вверх, затем небольшой поворот платформы с заготовкой (Table B) вокруг вертикальной оси, то вниз, снова небольшой поворот, снова вверх и т. д.<sup>10</sup> Благодаря пантографу создание основы глиняной модели не занимает много времени.

На следующем этапе из полученных глиняных модельных блоков складывают прототип стены. Блоки пока не имеют специально изготовленных посадочных поверхностей. Исходя из размеров и формы блоков, каждому блоку в прототипе стены определяется его местоположение. Архитектор-строитель приблизительно размечает на глиняной модели стены контуры будущих сопряжений, которые должны: отражать задуманный стиль, обеспечивать устойчивость создаваемой полигональной кладки, минимизировать затраты труда на обработку посадочных поверхностей. Далее согласно выполненной разметки



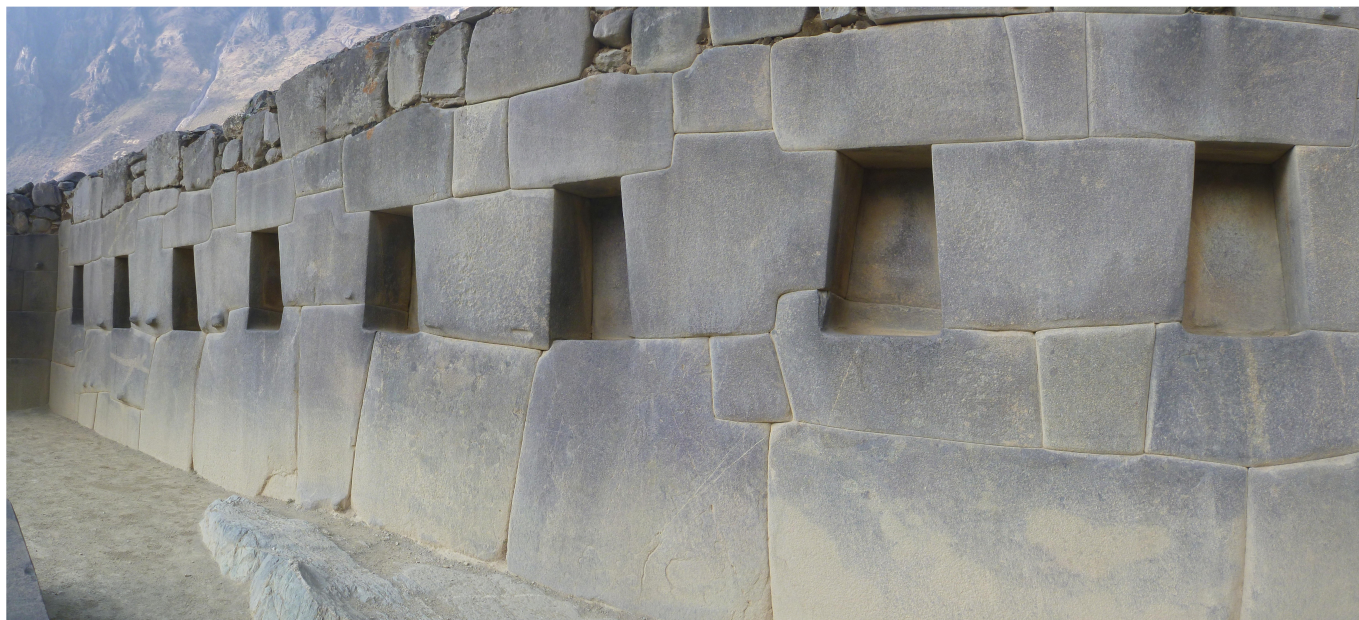

Фото. 10. Ольянтайтамбо (Р. Adams, 2012)

глина выбирается в тех местах модельных блоков, которыми они будут примыкать друг к другу.

Теперь из полученных модельных блоков собирается модель стены. Небольшими правками блоки точнее досопрягаются друг с другом. Если в ходе манипуляций модель блока случайно испортили, то форму модели в любом её месте всегда можно восстановить, поместив модель блока обратно в пантограф (на указанный выше штырь) и сравнив с формой исходной каменной заготовки. Далее стена сушится. В начале сушится нижний ряд, затем следующий за ним и т. д. В процессе сушки-усадки модельные блоки досопрягаются более точно под собственным весом.

На последнем этапе модельную стену разбирают. Глиняную модель блока устанавливают обратно в пантограф (на указанный выше штырь) и с помощью молотка и зубила переносят посадочные места на соответствующую этому модельному блоку каменную заготовку.

В описанном способе каменный блок устанавливается в пантограф по меньшей мере дважды. Для того чтобы можно было точно вернуть каменный блок на прежнее место, на платформу (Table B) следует нанести, например, две линии, радиально расходящиеся из её центра. При первой установке каменного блока в местах, где такие линии выходят из под блока, на поверхности камня краской наносятся риски совмещения.

## **2.7. Ещё несколько преимуществ пантографа**

Использование уменьшенной глиняной модели и пантографа позволяет изготавливать блоки прямо в карьере, где происходит добыча камня.<sup>2,3</sup> В результате из карьера на стройплощадку везут уже готовые каменные блоки. Данный подход заметно сокращает веса транспортируемых блоков и уменьшает объём перевозок в целом. Кроме того, при такой организации на стройплощадке не возникает большого количества строительного мусора, который тоже потом нужно куда-то транспортировать с места строительства.

И в способе с пантографом, и в способе с репликами используются вспомогательные элементы. В способе с пантографом это глиняные модельные блоки, в способе с репликами это сами реплики. Для стыковки каменных блоков в способе с репликами боковая поверхность блока должна быть разбита на несколько перекрывающихся участков, для каждого из которых требуется своя реплика. Если теперь мысленно приставить к боковой поверхности краевого каменного блока все сделанные для него и по нему реплики, то получится некое подобие колеса, т. е. достаточно массивное образование. Если исполь-



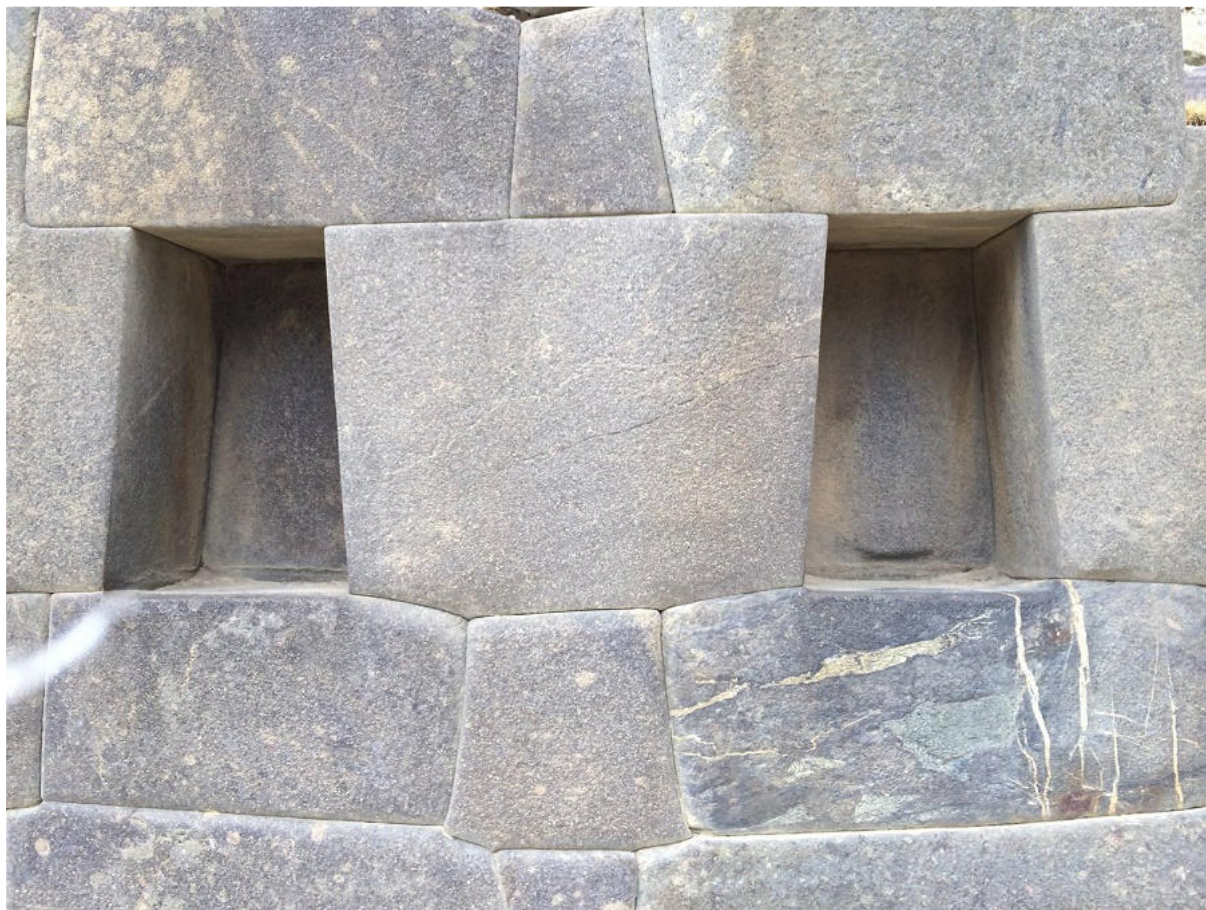

Фото. 11. Ольянтайтамбо (А. Fuchs, 2008)

зуется реплика реплики, то таких “колёс” будет уже два. Таким образом, в методе реплика реплики для каждого некраевого блока потребуется изготовить по одному “колесу” из реплик. Давайте теперь сравним такое “колесо” из реплик с небольшими модельными блоками в методе, базирующемся на пантографе. Преимущества пантографа очевидны.

### **2.8. Метод, сочетающий элементы методов реплики, глиняной модели и 3D-пантографа**

Вначале на месте будущей постройки устанавливается каждый второй каменный блок первого ряда. Пустые позиции между этими блоками займут блоки, которые на следующем этапе будут подгоняться с использованием глиняной модели и пантографа под эти первоначально установленные блоки. Поверхности оснований первоначально установленных каменных блоков предварительно обрабатываются должным образом для придания им устойчивости.

Помимо подготовленного основания первоначально установленные блоки также имеют окончательно обработанные боковые грани. Обработка боковых граней представляет собой спрямление с помощью молотка и зубила сложной исходной формы каменной заготовки близкими к плоскостям поверхностями. Грани первоначально установленных блоков справа и слева от основания по возможности должны иметь положительный наклон к основанию, чтобы облегчить последующую установку примыкающих блоков между ними. Аналогичное правило распространяется далее для каждого второго блока последующих рядов полигональной кладки.

Теперь пространство между первоначально установленными блоками заполняется глиной. Фактически в промежутках между первоначальными блоками создаются глиняные модели блоков в масштабе 1:1. Боковые поверхности этих моделей, контактирующие слева и справа с боковыми поверхностями первоначальных блоков, по сути являются их



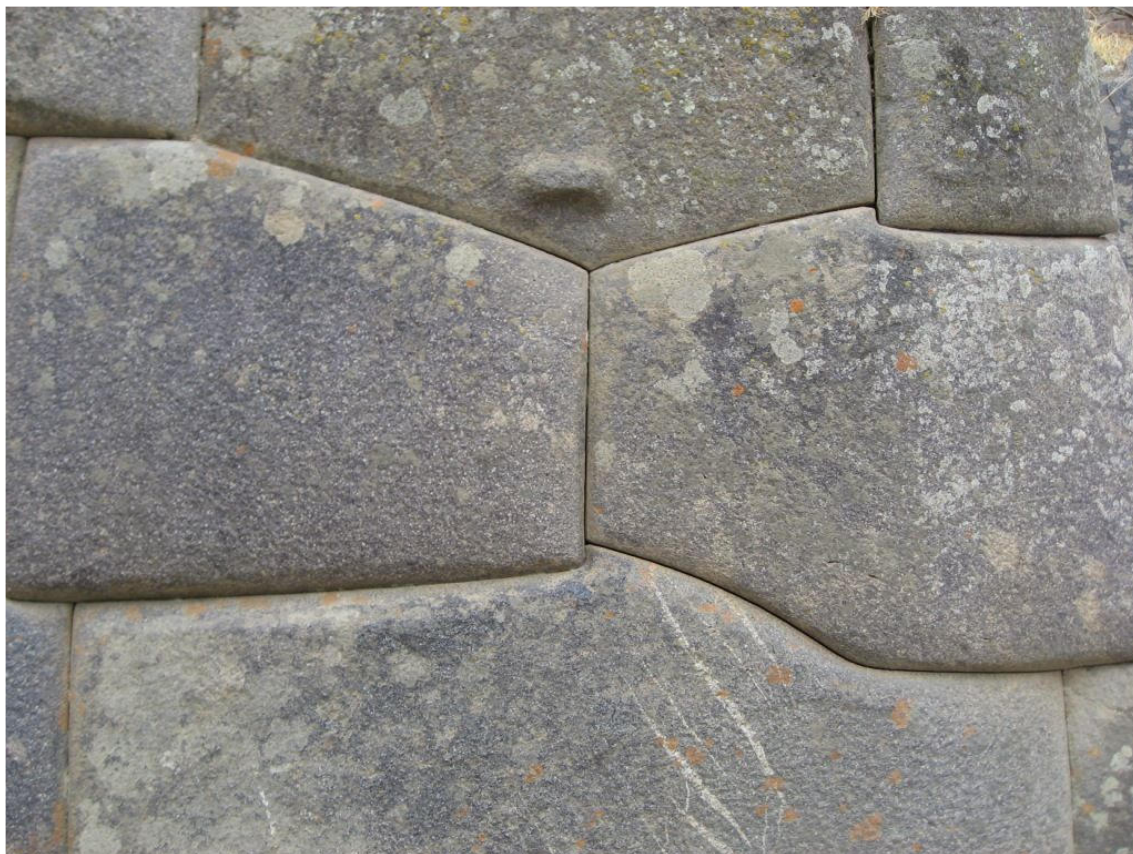

Фото. 12. Ольянтайтамбо (B. Everett)

репликами. Для облегчения глиняных моделей и уменьшения усадочных деформаций во время сушки модели выполняются пустотелыми.

После сушки глиняная модель блока извлекается из постройки и устанавливается в пантограф на место модели (Table A). На место копии (Table B) устанавливается соответствующая каменная заготовка. Пантограф настраивается на масштаб 1:1 (размещение модели и копии в пантографе при таком масштабе определяется только удобством работы). В случае необходимости с помощью пантографа можно быстро проверить – насколько хорошо по размерам подходит выбранная каменная заготовка к данной модели.

Далее поверхности сопряжения с помощью пантографа, молотка и зубила переносят с глиняной модели на каменную заготовку так, как описывалось выше. После переноса поверхностей сопряжения на оставшейся боковой поверхности каменной заготовки формируют остальные (произвольные) грани этого блока. Обработка этих граней представляет собой спрямление сложной исходной формы каменной заготовки близкими к плоскостям поверхностями. В дальнейшем эти грани больше обрабатываться не будут.

Полученный таким путём каменный блок окончательно устанавливают на своё место полигональной кладки. Закончив первый ряд, аналогичным образом изготавливают следующий. Для лучшей вертикальной перевязки блоков, каждый второй блок предыдущего ряда по высоте следует стремиться доводить примерно до середины следующего ряда.

В описанном методе, как и в ранее предложенных, используются каменные блоки произвольной формы. Поскольку в данном методе нет полноценной глиняной модели постройки, то, чтобы хорошо скомпоновать исходные каменные блоки и тем самым минимизировать количество скалываемого материала при обработке, каменные блоки желательно предварительно выложить на земле тыльной стороной вниз один подле другого.

К недостатку метода следует отнести высокую трудоёмкость, связанную с изготовлением глиняной модели блока в масштабе 1:1. Тем не менее, в сравнении с методом реплики реплики, данный метод в состоянии обеспечить заметно более высокую точность сопря-



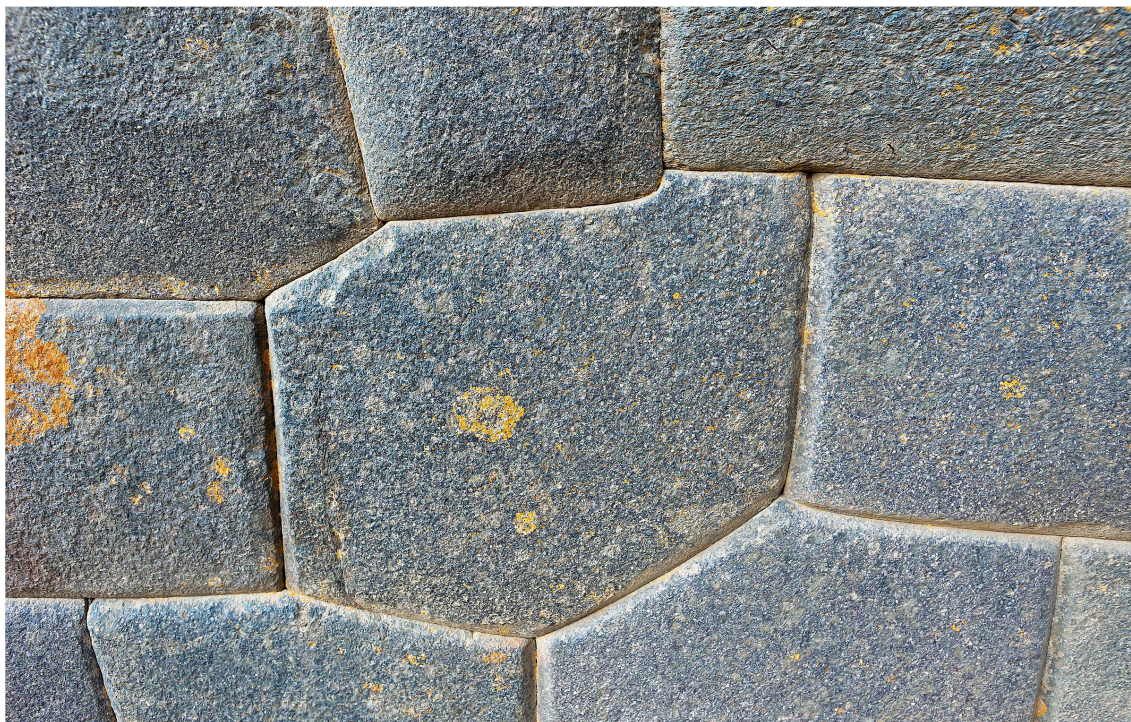

Фото. 13. Ольянтайтамбо (И. Отъкало, 2015)

жения контактирующих поверхностей, когда таковая необходима. Как и в случаях с репликами, примерно половина боковой поверхности каменных блоков в данном методе обрабатывается произвольно.

## **2.9. “Планетарный” пантограф для использования в строительстве**

Современные пантографы, используемые скульпторами, имеют две синхронно поворачивающиеся платформы. На одной платформе (см. Table A на Рис. 1) установлена модель, на другой (Table B) – её увеличенная копия. Обычно увеличенная копия пустотелая, от чего вес копии, как правило, невелик. Платформа такого пантографа при применении его в строительстве сможет выдержать каменные заготовки весом до примерно 700 кг. Когда скульптура имеет большие размеры и большой вес, её модель можно разделить на несколько частей. Для каждой такой части можно изготовить её увеличенную копию, после чего из полученных увеличенных копий собрать одну большую скульптуру. Но это не наш случай.

Современный пантограф для работы с большими и тяжёлыми заготовками не подходит. Вместо существующей конструкции можно предложить следующий “планетарный” пантограф. Тяжёлая заготовка в таком пантографе устанавливается просто на ровную площадку, а рама, к которой крепятся стрела пантографа и платформа с моделью, поворачивается в процессе работы в горизонтальной плоскости вокруг неподвижно стоящей заготовки. По мере поворота рамы модель также поворачивается вокруг своей вертикальной оси на необходимый угол (сохраняет исходную ориентацию в пространстве) с помощью соответствующего механизма. Одному обороту точки опоры (Pivot на Рис. 1) стрелы пантографа вокруг заготовки соответствует один оборот модели вокруг своей оси.

В отличие от существующего пантографа планетарный пантограф занимает больше места, а использующий пантограф человек вынужден перемещаться по мере работы вместе с поворачивающейся рамой вокруг заготовки. Эти особенности можно отнести к недостаткам планетарного пантографа, которые, впрочем, вовсе не критичны в строительном деле.



## **2.10. Выпуклость лицевой стороны блока, наплыв в нижней части, заострения в местах тройных стыков**

Характерная выпуклость лицевой поверхности блоков, а также наличие наплыва в нижней части блоков (не путать с боссами/сосцами), обнаруживаемые в некоторых постройках, часто служат одним из доказательств “бетонной” и “пластичной” версий изготовления полигональной кладки. Согласно “бетонной” версии<sup>5</sup> блоки отливались из бетона, согласно “пластичной” версии<sup>6</sup> использовалась размягчённая в результате нагрева каменная масса. В “бетонной” и в “пластичной” версиях не до конца затвердевшие блоки укладывались друг на друга. В результате межблочные зазоры в полигональной кладке смыкались под действием собственного веса этих блоков.

В предлагаемом способе оба признака – выпуклость и наплыв могут сами собой появиться на стадии изготовления глиняной модели стены, если глиняный замес не достаточно густой и не используется какой-то ограждающей конструкции с лицевой и тыльной сторон. Выпуклость и наплыв также могут быть изготовлены намеренно в процессе лепки глиняной модели.

Скорее всего выпуклость и наплыв придавались блокам намеренно. Обе особенности усиливают ощущение массивности, грандиозности постройки, её колоссального веса; нам кажется, будто камни сплющиваются под огромной тяжестью. Выпуклость была также призвана продемонстрировать наивным индейцам могущество прибывших белых, способных при необходимости “вылепливать” постройку из громадных твёрдых камней, словно из теста.

Отметим, что с помощью предложенного способа также можно получать большие блоки из бетона, искусственного гранита и других материалов путём отливки в форму. Используя пантограф, уменьшенную глиняную модель блока увеличивают до нужного размера. Увеличенная копия из глины для облегчения веса делается пустотелой. Далее по увеличенной глиняной копии изготавливается литевая форма.

В местах, где стыкуются три смежных блока, хорошо видны заострения (“клювики”/ступеньки, см. Рис. 2). Эти элементы создаются в процессе лепки глиняной модели и затем переносятся с помощью пантографа на каменный блок. Помимо упора, ограничивающего перемещение смежного блока в горизонтальной плоскости, клювики/ступеньки придают полигональной кладке особое изящество. Клювики вместе с параллельностью плавно изменяющихся криволинейных кромок должны были по замыслу создателей придать ощущение лёгкости работы с камнем. Эти особенности заставляют зрителя думать, что блоки буквально вылеплены из камня. И надо отдать должное старым мастерам, этот приём им удался!

Учитывая сказанное выше, вместо термина “полигональная кладка” будет вполне справедливо использовать термин “полигональная скульптура” в тех случаях, когда каменная постройка создаётся на основе ручной лепки глиняной модели, выполненной в определённом художественном стиле с уникальными замковыми сопряжениями между блоками.

## **2.11. Косвенная датировка по наблюдаемым разрушениям элементов кладки**

Одно из слабых в смысле прочности мест полигональной кладки это клювик. Поэтому клювики должны разрушаться в ходе естественного процесса выветривания в первую очередь. Многие камни в Перу покрыты лишайником, поэтому при оценке скорости разрушения камня помимо выветривания должен также учитываться и биологический фактор. Удивительно, но в горах (Куско, Мачу-Пикчу, Ольянтайтамбо и др.), где климат характеризуются резкими перепадами температуры (15-20° C) в течение суток, большим количеством осадков и заморозками зимой (июнь-август),<sup>13</sup> рассматриваемая в статье разновидность полигональной кладки прекрасно сохранились.



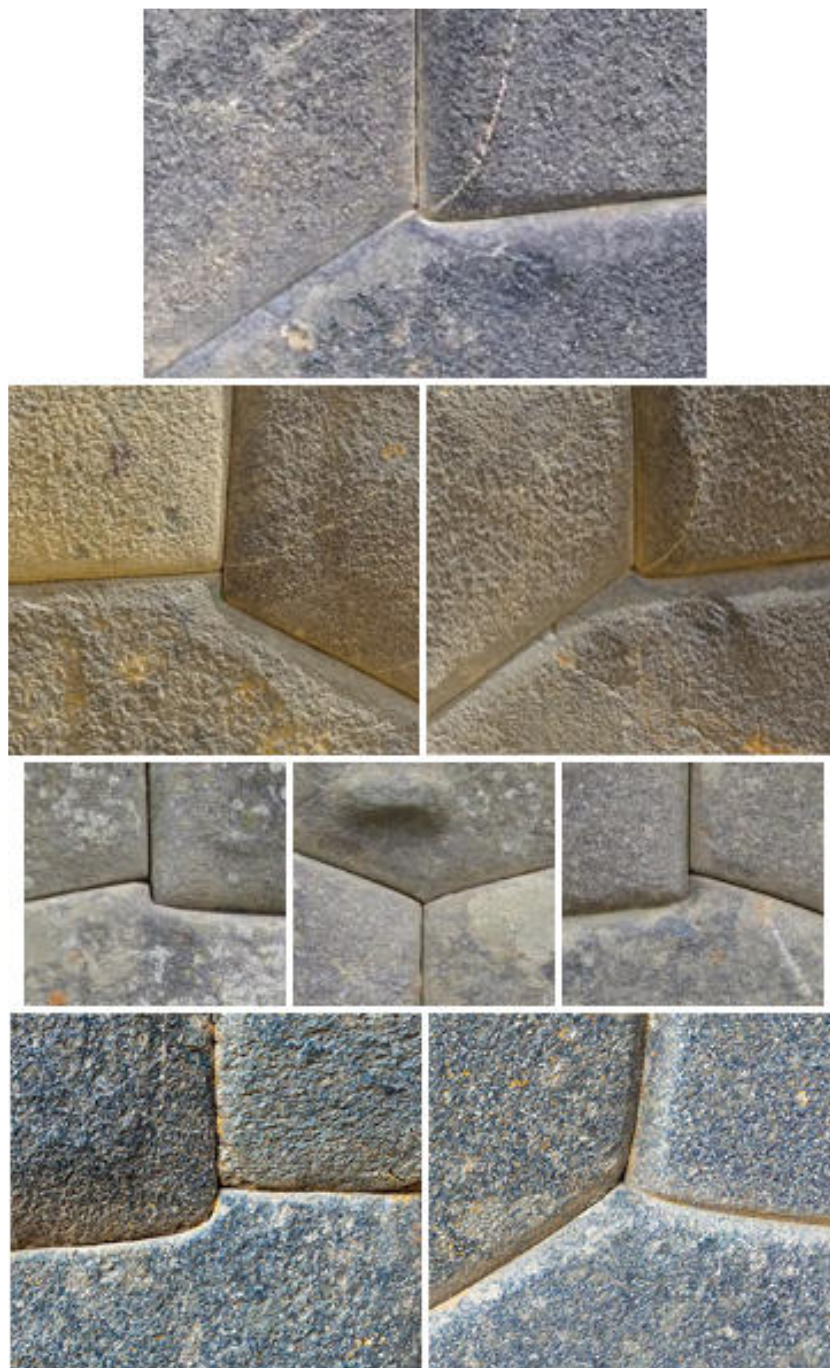

Рис. 2. “Клювики” и ступеньки

Помимо выветривания причиной разрушения клювиков может быть сдвиг камней в кладке при оползневом смещении склона или при землетрясении<sup>12</sup>. Следует отметить, что сколы клювиков могли возникнуть и в процессе изготовления каменных блоков, и при их транспортировке, и во время установки, и при реставрации. Некоторые из таких сколов можно частично исправить. Исправленные клювики будут выглядеть более утопленными в тело кладки, чем нормальные.

Изучение полигональных кладок из твёрдых пород (гранит, андезит, базальт) показывает, что разрушения клювиков имеются, но этих разрушений мало. Отсутствие заметных разрушений при достаточно суровых климатических условиях и высокой сейсмической активности в Перу, дают основание утверждать о сравнительно недавней постройке мегалитических комплексов. Оцениваемый срок существования построек составляет порядка 300 лет.



## **2.12. Как доказать? Что и где следует искать?**

Что может служить подтверждением предлагаемых способов изготовления полигональной кладки? На территории или вблизи комплексов с полигональной кладкой или в карьерах должен сохраниться строительный мусор, в котором следует искать обломки глиняных моделей блоков и обломки глиняных/гипсовых реплик. Конечно, прежде всего нужно ознакомиться с материалами, проводившихся раскопок. Возможно, какие-то подходящие по форме, размерам и материалам обломки уже были найдены и задокументированы. Большая часть обломков, скорее всего, шла на укрепление грунта под следующую возводимую постройку. Поэтому в случае перекладки какой-либо постройки, связанной с её естественным разрушением, свидетельства в виде глиняных моделей и реплик следует искать и в грунте под самой постройкой.

Если предположить, что в пантографе, используемом строителями, глиняная модель и каменная заготовка располагались также, как и в современном пантографе, т. е. горизонтально тыльной стороной вниз (для фиксации блока в случае неровной тыльной поверхности используются подпорные камушки), то следы от зубила на боковой поверхности каменных блоков должны проходить справа на лево (зубило в левой руке, молоток в правой) и сверху вниз (в начале следа углубление больше, чем в конце). Сами следы должны представлять собой короткие параллельные штришки, расположенные вертикальными столбцами.

Следы от зубила нужно искать на каменных блоках из твёрдых пород – гранит, андезит, базальт. Мягкие породы камня, такие как известняк, имеют высокую пористость; поверхностный слой этих камней быстро разрушается выветриванием. Кроме того, следы от зубила на поверхности известняка легко уничтожаются в ходе последующей операции сглаживания обстукиванием. Поверхности сопряжения каменных блоков из твёрдых пород, которые пролежали под открытым небом вне кладки неизвестно сколько лет, также нет смысла изучать по причине выветривания. Для анализа поверхности сопряжения следует брать камни из какой-то нетронутой кладки с минимальными зазорами, в которые могло попадать очень незначительное количество влаги.

Следует отметить, что кладку из каменных блоков, которой несколько сотен лет, скорее всего, невозможно разобрать так, чтобы сохранить неповреждённым поверхностный слой камня в местах контакта. Дело в том, что в течение всего срока существования кладки в указанных выше климатических условиях в местах контакта протекали различные физико-химические процессы, в ходе которых в зависимости от процесса место контакта могло разрушаться (с образованием песка), а могло напротив упрочняться. Попытка разъединения мест, где возникло упрочнение, приведёт к разрушению поверхностного слоя камня, примыкающего к контакту. В любом случае после разборки старой полигональной кладки размеры камней и их геометрия изменятся. Поэтому снова собрать блоки так, чтобы между ними были прежние крошечные зазоры, уже не получится.

## **2.13. Косвенная датировка по времени изобретения 3D-пантографа**

Если принять предложенную версию изготовления полигональной кладки с помощью пантографа, то можно приблизительно датировать постройки “невероятно” древних Инков годами изобретения/постройки пантографов европейцами. Пантограф для работы с плоским рисунком изобретён в 1603-1605 годах Кристофом Шейнером.<sup>14</sup> Отметим, что информация об устройстве этого пантографа была опубликована автором в виде отдельной книги<sup>15</sup> только спустя 28 лет после изобретения.

Примерно в 1710-1720 годах русскими механиками Францем Зингером и Андреем Нартовым<sup>16</sup> был построен токарно-копировальный медальерный станок.<sup>17, 18</sup> Станок предназначался для изготовления в автоматическом режиме медалей путём переноса рельефа с модели медали большого размера. Сравнивать станок Зингера-Нартова с современным 3D-пантографом, используемым скульпторами (см. Рис. 1), не совсем корректно, так как



кинематические схемы этих механизмов сильно различаются. Несмотря на это, следует обратить внимание на сложность механизма станка, которая заметно превосходит сложность механизма современного пантографа. В частности, в 3D-пантографе перемещение щупа по поверхности модели и приложение режущего инструмента к поверхности заготовки осуществляются скульптором вручную, тогда как в приводимом примере станка эти функции реализуются без участия человека. Отметим, что в 18 веке копировальные станки подобные данному строились и использовались во многих европейских странах.

В 1807 году Джеймс Уатт<sup>19</sup> приступил к созданию механизма,<sup>20</sup> предназначенного для получения уменьшенных копий скульптур.<sup>21</sup> Кинематическая схема механизма Уатта близка к кинематической схеме современного 3D-пантографа. Однако имеется ряд отличий. Вместо шарового шарнира стрела установлена на карданном шарнире; отсутствует параллелограммный механизм; модель и её уменьшенная копия расположены горизонтально и др.

Наиболее близким по кинематической схеме к современному 3D-пантографу (см. Рис. 1) является пантограф, построенный в 1826 году Бенжамином Чевертоном.<sup>22</sup> При постройке своего пантографа Чевертон опирался на конструкцию, ранее предложенную Джоном Хокинсом.<sup>23</sup> Также как и пантограф Уатта пантограф Хокинса-Чевертона предназначался для получения уменьшенных копий скульптур.

Следует отметить, что и пантограф Уатта, и пантограф Хокинса-Чевертона имели встроенный гравёр, фрезой которого выполнялась механическая обработка заготовки. Гравёр в рассмотренных выше способах создания полигональной кладки не требуется. Поэтому конструктивно строительный пантограф проще пантографов Уатта и Хокинса-Чевертона.

Нет сомнения, что, создав 2D-пантограф в начале 17 века, учёные того времени и прежде всего сам изобретатель 2D-пантографа Кристоф Шейнер сразу же задумались над созданием механизма 3D-пантографа, с помощью которого было бы возможно получать уменьшенные/увеличенные копии трёхмерных объектов. Собственно, для перехода к работе с трёхмерными объектами 2D-пантограф всего лишь следовало закрепить не в цилиндрическом, а в шаровом шарнире; параллелограммному механизму дать возможность свободно вращаться вокруг установленного в шаровом шарнире плеча (стрелы пантографа), а модель и заготовку снабдить способностью синхронного поворота вокруг своих вертикальных осей посредством цепной (см. Рис. 1) или зубчатой<sup>22</sup> передач.

В строительном пантографе применение цепной передачи более оправдано, чем зубчатой. Дело в том, что из-за больших размеров и веса обрабатываемых каменных блоков размеры и вес используемых зубчатых колёс оказываются большими. Кроме того, цепная передача позволяет легко изменять расстояние между поворотными платформами, которое отвечает за коэффициент уменьшения/увеличения пантографа. Изменение расстояния осуществляется путём смещения платформ вдоль рамы. Для этого к цепи добавляется или из цепи изымается соответствующее число звеньев. Коэффициент уменьшения/увеличения при этом оказывается практически непрерывной величиной. Для изменения расстояния в случае зубчатой передачи промежуточное колесо заменяется на подходящее из имеющегося обычно ограниченного набора колёс разного диаметра. Поэтому коэффициент уменьшения/увеличения оказывается дискретным.

Анализируя механизмы подобные станку Зингера-Нартова, можно сделать вывод о том, что разработка и постройка 3D-пантографа современной конструкции с точки зрения сложности кинематической схемы, технологии металлообработки и используемых материалов была вполне по силам механикам уже в начале 18 века. К тому времени все проблемы, связанные с точностью копирования, а именно: зазоры в шаровом и цилиндрических бронзовых шарнирах, люфты в цепной/зубчатой передаче, а также жёсткость стрелы и рамы (требуется для поддержания неизменным относительного расположения элементов пантографа в процессе функционирования), уже были успешно решены. Поэтому



очень странно, что для создания 3D-пантографа потребовалось так много времени – более 220 лет!

В настоящий момент у нас нет ни письменных, ни материальных свидетельств, подтверждающих существования строительного 3D-пантографа в 18 веке. Как бы там ни было, учитывая уровень техники того времени, нельзя исключить возможности того, что такой пантограф мог быть разработан, построен и нашёл ограниченное применение в строительстве, но сам изобретатель и его пантограф остались при этом неизвестны широкому кругу специалистов. Дело в том, что мастера-каменщики в те времена не спешили раскрывать свои профессиональные секреты. Судя по тому, как долго просуществовала загадка создания полигональной кладки, мастера-каменщики умели хранить свои секреты хорошо.

### **2.14. Кто строил, когда и на какие средства?**

Проблема с постройками, выполненными на основе полигональной кладки, состоит в следующем. Официальная история утверждает, что постройки существовали до прибытия европейцев в Новый Свет в 16 веке, и американские индейцы не знали на тот момент ни железных орудий, ни колеса и не имели тягловых животных. Из такой постановки следует один единственный вывод: постройки возведены, какой-то более древней цивилизацией, существовавшей в Америке до индейцев, но по культуре работы с камнем соответствующей в целом европейской строительной культуре 16-17 века.

Проблема с этой мифической более древней цивилизацией состоит в том, что она не оставила после себя никаких иных материальных свидетельств своего существования за исключением безупречно выполненных каменных построек. Как справедливо отмечено в работе 7, качественная полигональная кладка и сооружения на её основе мгновенно (по историческим меркам) возникают как бы из неоткуда, а затем также мгновенно в никуда исчезают. Нет ни предшествующего, ни последующего заметного развития архитектуры и технологии этих построек. А ведь такое происходит только тогда, когда на некоторую территорию на короткий срок, скажем, на 10 лет, заезжает группа строителей-профессионалов со своими инструментами, приспособлениями и приёмами строительства.

Быстротечность событий, происходивших в строительной сфере тех лет, указывает на высокую производительность труда строителей-гастролёров и их методов строительства. Перечисленные противоречия моментально разрешаются, если авторами построек становятся заезжие европейские строители,<sup>24, 25, 26</sup> а время возведения построек переносится из минус бесконечности в 18 век. Для доставки, перемещения и грубой обработки камней, укрепления склонов и прочих тяжёлых и не требующих никакой квалификации работ, разумеется, нагонялся местный индейский люд по приказу подчинившихся/купленных Испанцами индейских вождей. Таким образом, перуанские мегалитические комплексы являются в определённом смысле постройками и Инков тоже, хотя и не столь древних.

Всякое большое строительство всегда опирается на какую-то крепкую экономическую основу. Трудно себе представить, чтобы мегалитические комплексы для индейцев возводились за счёт испанцев. Безусловно, эти комплексы создавались за счёт индейцев и на костях индейцев. Но, что могли предложить индейцы испанским колонизаторам? То золото и серебро, которое имелось у индейцев, было захвачено в первые годы завоевания и увезено в Европу. Родить много хлопка, сахарного тростника или зерна перуанская земля была не в состоянии.

Раз золото и серебро у индейцев на момент завоевания имелось, значит, где-то они его брали. Поэтому испанцами была организована добыча золота и серебра в рудниках и на приисках. А, чтобы работа в коях шла веселее, туземное жречество вдохновляло индейцев видом и грандиозностью мегалитических храмов, которые возводились за счёт части средств, полученных от добычи драгметаллов. Через несколько десятков лет легкодос-



тупные месторождения золота и серебра иссякли, и строительство мегалитических комплексов остановилось. К этому моменту власть Испанцев и католической церкви как-то незаметно усилилась, а численность индейцев каким-то “непостижимым” образом сильно сократилась.

То ли питались горняки скверно, то ли жизнь в лачугах не прибавляла им здоровья, то ли места “силы” уже не компенсировали сил, забираемых истощающей работой в рудниках, история это умалчивает. В общем, наступило время, когда часть заброшенных культовых построек индейцев можно было, наконец, без особых проблем пустить в дело. И эти постройки пошли в дело. Каменные блоки и части построек использовали для возведения католических соборов, монастырей, дворцов, вилл и городских зданий.

### 3. Обсуждение

Среди материалов по теме следует отметить работу 6, автор которой предложил использовать уменьшенную гипсовую модель каменного блока, а перенос сложной геометрии поверхности и её масштабирование выполнять по нескольким опорным точкам с помощью кронциркуля. Гипсовая модель, обычно требуется для того, чтобы при изготовлении копий не изнашивать оригинальную модель из глины. При изготовлении блоков для полигональной кладки такой проблемы не возникает. Более того, при изготовлении модели блока по каменной заготовке произвольной формы, глиняная модель служит один раз и затем выбрасывается (служит основой для новой модели). Таким образом, для достижения требуемого результата вполне достаточно только глиняной модели блока.

Сам процесс переноса сложной геометрии модели и её масштабирование по немногим опорным точкам с помощью кронциркуля очень трудоёмкий и неточный. Однако этот процесс перестаёт быть таковым, если вместо кронциркуля используется пантограф. Анализ показывает, что в большинстве случаев сначала по каменной заготовке произвольной формы с помощью пантографа создавалась её глиняная модель. Затем в глиняной модели блока вырезались места под сопряжения с соседними блоками. После чего из модельных блоков собиралась модельная стена. После сушки стена разбиралась, и места сопряжения модельных блоков с помощью пантографа переносились на свои каменные заготовки. Поскольку в строительстве, как, впрочем, и в любой другой сфере нет универсальных решений, то помимо пантографа строители пользовались приёмами, основанными на применении реплик.

Помимо простой обработки лицевых сторон каменных блоков описанная технология позволяет создавать полигональную кладку (облицовку), лицевая поверхность которой представляет собой барельеф. Примером, где могла быть применена подобная кладка/облицовка, является камбоджийский храмовый комплекс Ангкор.<sup>27</sup>

Знания, накопленные в области механики, и уровень технологии, достигнутые к началу 18 века, вполне позволяли сконструировать и построить 3D-пантограф, пригодный для нужд строительства. Поэтому, если принять предложенный в статье способ создания полигональной кладки, то строительство ряда мегалитических комплексов Перу следует датировать не ранее начала 18 века.

### Фотографии

На фотографиях представлены полигональные кладки, которые могут быть получены с помощью предложенных в статье способов. Отличительные черты этих кладок: каменные блоки большие весом от нескольких сотен килограмм до нескольких тонн, блоки сопрягаются друг с другом вплотную без зазора через сложные криволинейные протяжённые поверхности.

### Благодарности

Автор выражает благодарность О. В. Объедкову, профессору И. К. Фоменко и О. Э. Ляпину за критическое прочтение рукописи.



## Материалы по теме

1. O. J. Outwater, "[Building the fortress of Ollantaytambo](#)", Archaeology, vol. 12, no. 1, pp. 26-32, 1959.
2. J.-P. Protzen, "[Inca quarrying and stonecutting](#)", Journal of the Society of Architectural Historians, vol. 44, no. 2, pp. 161-182, 1985.
3. J.-P. Protzen, "Inca architecture and construction at Ollantaytambo", Oxford University Press, 303 pp., New York, Oxford, 1993.
4. V. R. Lee, "[The building of Sacsahuaman](#)", Ñawpa Pacha – Journal of Andean Archaeology, vol. 24, iss. 1, pp. 49-60, 1986.
5. Александр, "[Полигональная кладка: дачные технологии](#)", YouTube, 2015 г.
6. Разгадки истории, "[Как делали полигональную кладку?](#)", YouTube, 2019 г.
7. GRESAR, "[Следы чужих технологий](#)", серии 1-8, YouTube, 2019-2021 г.
8. [Pantograph](#), Wikipedia.
9. M. Rogińska-Niesłuchowska, "[The pantograph and its geometric transformations – a former popular tool for copying and scaling](#)", The Journal of Polish Society for Geometry and Engineering Graphics, vol. 29, pp. 59-65, 2016.
10. Michael Keropian, "[3D Pantograph Enlarging](#)", parts 1-7, YouTube, 2018 г.
11. T. Gauthier, "[Photosculpture](#)", Le Monde illustré, pp. 396-398, December 17, 1864 (in French).
12. [Землетрясения в Перу](#), Википедия.
13. [Климат Перу](#), Википедия.
14. [Кристоф Шейнер](#), Википедия.
15. C. Scheiner, "[Pantographice seu ars delineandi res quaslibet per parallelogrammum lineare seu cavum, mechanicum, mobile](#)", Typographia Ludouici Grignani, 108 pp., Rome, 1631 (на латыни).
16. [Андрей Константинович Нартов](#), Википедия.
17. [Токарно-копировальный медальерный станок](#), Государственный Эрмитаж, Санкт-Петербург.
18. В. В. Данилевский, "[Нартов и "Ясное зрелище машин"](#)", под редакцией А. С. Бриткина, Машгиз, 271 стр., Москва, Ленинград, 1958.
19. [Джеймс Уатт](#), Википедия.
20. [Reducing sculpture copying machine](#), Science Museum, London.
21. J. P. Muirhead, "[The life of James Watt, with selections from his correspondence](#)", pp. 454-466, 2nd revised edition, 572 pp., John Murray, London, 1859.
22. [Machine for reproducing sculpture](#), Science Museum, London.
23. [John I. Hawkins](#), Wikipedia.
24. Александр Таманский, "[Кто и когда построил египетские пирамиды?](#)", YouTube, 2020 г.
25. Александр Таманский, "[Как построили египетские пирамиды?](#)", YouTube, 2021 г.
26. Александр Таманский, "[Кто построил американские пирамиды?](#)", YouTube, 2021 г.
27. [Ангкор](#), Википедия.
